# Supplementary material for: How do participant experiences and characteristics influence engagement in exercise referral? A qualitative longitudinal study of a scheme in Northumberland, UK
Source: PubMed Central journal article supplement — BMJ Open. 2019 Feb 20;9(2):e024370. doi: 10.1136/bmjopen-2018-024370 (PMC6398729; doi:10.1136/bmjopen-2018-024370), 2019-02-20
Supplement: bmjopen-2018-024370.draft_revisions.pdf [file bmjopen-2018-024370.draft_revisions.pdf]

# BMJ Open

BMJ Open is committed to open peer review. As part of this commitment we make the peer review history of every article we publish publicly available.

When an article is published we post the peer reviewers' comments and the authors' responses online. We also post the versions of the paper that were used during peer review. These are the versions that the peer review comments apply to.

The versions of the paper that follow are the versions that were submitted during the peer review process. They are not the versions of record or the final published versions. They should not be cited or distributed as the published version of this manuscript.

BMJ Open is an open access journal and the full, final, typeset and author-corrected version of record of the manuscript is available on our site with no access controls, subscription charges or pay-per-view fees (<http://bmjopen.bmj.com>).

If you have any questions on BMJ Open's open peer review process please email [info.bmjopen@bmj.com](mailto:info.bmjopen@bmj.com)

# BMJ Open

## Understanding engagement and non-engagement: A longitudinal qualitative study of participant experiences of an exercise referral scheme

|                               |                                                                                                                                                                                                                                                                                                                                                                                                                                                                                                                                                                                                                                                                                                                                         |
|-------------------------------|-----------------------------------------------------------------------------------------------------------------------------------------------------------------------------------------------------------------------------------------------------------------------------------------------------------------------------------------------------------------------------------------------------------------------------------------------------------------------------------------------------------------------------------------------------------------------------------------------------------------------------------------------------------------------------------------------------------------------------------------|
| Journal:                      | <i>BMJ Open</i>                                                                                                                                                                                                                                                                                                                                                                                                                                                                                                                                                                                                                                                                                                                         |
| Manuscript ID                 | bmjopen-2018-024370                                                                                                                                                                                                                                                                                                                                                                                                                                                                                                                                                                                                                                                                                                                     |
| Article Type:                 | Research                                                                                                                                                                                                                                                                                                                                                                                                                                                                                                                                                                                                                                                                                                                                |
| Date Submitted by the Author: | 24-May-2018                                                                                                                                                                                                                                                                                                                                                                                                                                                                                                                                                                                                                                                                                                                             |
| Complete List of Authors:     | Hanson, Coral; Edinburgh Napier University, School of Health and Social Care; Durham University, Wolfson Research Institute for Health and Wellbeing Physical Activity Special Interest Group<br>Oliver, Emily; Durham University, Department of Sport and Exercise Sciences,; Durham University, Wolfson Research Institute for Health and Wellbeing Physical Activity Special Interest Group<br>Dodd-Reynolds, Caroline; Durham University, Department of Sport and Exercise Sciences; Durham University, Wolfson Research Institute for Health and Wellbeing Physical Activity Special Interest Group<br>Allin, Linda; Northumbria University, Department of Sport, Exercise and Rehabilitation, Faculty of Health and Life Sciences |
| Keywords:                     | PUBLIC HEALTH, QUALITATIVE RESEARCH, Health policy < HEALTH SERVICES ADMINISTRATION & MANAGEMENT, PRIMARY CARE, PHYSICAL ACTIVITY, REHABILITATION MEDICINE                                                                                                                                                                                                                                                                                                                                                                                                                                                                                                                                                                              |
|                               |                                                                                                                                                                                                                                                                                                                                                                                                                                                                                                                                                                                                                                                                                                                                         |

SCHOLARONE™  
Manuscripts

Only

1  
2  
3 **Understanding engagement and non-engagement: A longitudinal qualitative study of**  
4 **participant experiences of an exercise referral scheme**  
5  
6  
7

8  
9 Coral L Hanson <sup>1,2</sup>, (corresponding author), Emily J Oliver <sup>2,3</sup>, Caroline J Dodd-Reynolds <sup>2</sup>,  
10  
11 <sup>3</sup>, Linda J Allin <sup>4</sup>  
12  
13

14  
15  
16 <sup>1</sup> School of Health and Social Care, Edinburgh Napier University, Sighthill Campus,  
17  
18 Edinburgh, EH11 4DN, UK. Email: c.hanson@napier.ac.uk Tel: 0131 455 3457  
19  
20

21  
22 <sup>2</sup> Wolfson Research Institute for Health and Wellbeing Physical Activity Special Interest  
23  
24 Group, Durham University, Durham, UK.  
25  
26

27  
28 <sup>3</sup> Department of Sport and Exercise Sciences, Durham University, Durham, UK.  
29  
30

31  
32  
33 <sup>4</sup> Department of Sport, Exercise and Rehabilitation, Faculty of Health and Life Sciences,  
34  
35 University of Northumbria, Newcastle-upon-Tyne, UK  
36  
37

38  
39 Word count: 3991  
40  
41

42  
43  
44 Key Words: Public Health, Qualitative Research, Health Policy, Primary Care, Rehabilitation  
45  
46  
47  
48  
49  
50  
51  
52  
53  
54  
55  
56  
57  
58  
59  
60

## ABSTRACT

**Objectives:** Exercise referral schemes are internationally widespread. This study examined experiences of patients referred by healthcare professionals to one such scheme, in order to understand whom it served well, or poorly, and why.

**Design:** The study employed a qualitative longitudinal approach using semi-structured interviews, with results reported using COREQ guidelines.

**Setting:** Two leisure centres providing an 'emerging best-practice' exercise referral scheme in northeast England.

**Participants:** Referred patients (n = 11) who had not yet commenced the scheme, were recruited on a voluntary basis. Seven females and four males, with a range of non-communicable diseases: cardiovascular disease, mental health issues, diabetes, overweight/obesity and musculoskeletal problems participated.

**Intervention:** 24-week, twice weekly supervised exercise sessions and three one-to-one assessments (pre-scheme, 12-weeks and 24-weeks) for patients referred from primary and secondary care.

**Primary outcome measures:** Two longitudinal semi-structured interviews, prior to commencement and 12-20 weeks later, were thematically analysed using the framework approach. Analysis comprised seven stages: transcription, familiarisation, coding,

1  
2  
3 development and application of an analytical framework, charting data using a matrix, and  
4 interpretation of data. Interpretation went beyond descriptions of individual cases to develop  
5 themes, which identified and offered possible explanations for differing participant  
6 experiences.  
7  
8  
9  
10

11  
12  
13  
14 **Results:** Three overarching themes emerged. First, 'success', with engaged participants  
15 focused on health outcomes and reported increases in physical activity. Second, 'struggle',  
16 with short-term success but concerns regarding continued engagement. Participants reported  
17 scheme dependency and cyclical needs. Finally, 'defeat', where ill health, social anxiety,  
18 and/or poor participation experience made engagement difficult.  
19  
20  
21  
22  
23  
24  
25  
26  
27  
28

29 **Conclusion:** Some success in engaging those with non-communicable diseases was reported,  
30 resulting in positive effects on health and wellbeing. The study highlights complexity within  
31 exercise referral schemes, and inequality of access for those with challenging health and  
32 social circumstances. Improved, or different, behaviour change support is required for  
33 referrals finding engagement difficult.  
34  
35  
36  
37  
38  
39  
40  
41  
42  
43  
44  
45  
46  
47  
48  
49  
50  
51  
52  
53  
54  
55  
56  
57  
58  
59  
60

## ARTICLE SUMMARY

### Strengths and limitations of this study

- Advancing the predominantly quantitative or cross-sectional literature on participant adherence to exercise referral schemes (ERS), this study explored in-depth experiences over time.
- The study contributes to reducing the evidence gap identified, for example, by the UK National Institute of Health and Care Excellence, about which sub-groups ERSs work for and why.
- Results highlighted the need for discussions about suitability of referrals and delivery practices of this type of intervention, which is internationally widespread.
- The study failed to engage some of the original participants in second interviews, meaning that the experiences of some who may have been the least well-served by the intervention are unknown.
- Results are based on a sample of participants recruited from only one, albeit large-scale, ERS and since provider practices may vary, other scheme structures may impact experiences in different ways.

## INTRODUCTION

Regular physical activity (PA) has a beneficial effect on cardiovascular disease risk, diabetes, some cancers and all-cause mortality.<sup>1</sup> Despite this global levels of PA are low, hence the cost of PA to health-care systems in 2013 was estimated to be 53.8 billion international dollars.<sup>2</sup> Increasing population PA levels is therefore a high priority to reduce non-communicable diseases.<sup>3</sup> Understanding participation is important in planning action and this has been widely described in terms of demography, with inequalities apparent.<sup>4</sup> For example, there is an inverse relationship between PA and indicators of disadvantage such as socio-economic status<sup>5</sup> and multiple co-morbidities.<sup>6</sup> PA promotion initiatives must therefore consider how to target the least active.

An understanding of whether current PA programmes disproportionately benefit disadvantaged groups is required. Emerging evidence indicates the converse; with lower socioeconomic status, and increasing number of health conditions, medications and depressive symptoms negatively predicting adherence.<sup>7</sup> Factors affecting participation are complex, however, with personal and social factors also known to be barriers or facilitators to being active.<sup>8-12</sup> Understanding how and why existing programmes engage, or do not engage, participants with differing personal circumstance can inform future equitable practice.

An exercise referral scheme (ERS) is one option for health professionals to promote PA for those with non-communicable diseases.<sup>13</sup> Such schemes are internationally widespread, existing for example, in the United Kingdom (UK),<sup>14</sup> Denmark,<sup>15</sup> Spain<sup>16</sup> and Mexico.<sup>17</sup> In the UK, leisure providers usually deliver ERSs, directing participants into 10-24 weeks of supervised PA. The present study focused on one large scale ERS identified as emerging best

1  
2  
3 practice by Public Health England.<sup>18</sup> Although ERSs are broadly aimed at those with non-  
4  
5 communicable diseases, there is limited understanding of effective targeting. Exploring  
6  
7 whether sub-groups of participants are more or less likely to engage therefore has value in  
8  
9 informing practice.<sup>19</sup> This is important because cost-effectiveness analyses indicate that ERSs  
10  
11 need to reduce costs by 60%.<sup>20</sup> However, lack of evidence about effectiveness for participant  
12  
13 sub-groups may have resulted in an underestimation of benefits. Indeed, the UK National  
14  
15 Institute for Health and Care Excellence has identified a requirement to understand better  
16  
17 what ERS elements work best and for whom.<sup>21</sup>

21  
22 To implement successful and equitable ERSs, there is a need to better understand who  
23  
24 existing programmes work or do not work for, and why. Demographic evidence contributes  
25  
26 to understanding the first two of these questions;<sup>20 22</sup> however, the third requires a more in-  
27  
28 depth analytical approach. This study, a longitudinal examination of participant experiences  
29  
30 of taking part in an ERS, therefore aims to gain in-depth understanding of differential  
31  
32 engagement.

## 33 34 35 36 37 **METHODS**

38  
39  
40  
41 The study employed a qualitative approach and longitudinal design to explore experiences of  
42  
43 participants referred to a northeast England ERS. Results were reported using the COREQ  
44  
45 guidelines.<sup>23</sup> Overarching themes, encompassing a variety of participants with differing social  
46  
47 contexts and motives for referral, were established. Northumbria University Faculty of Health  
48  
49 and Life Sciences Ethics Committee granted study ethical approval (Ref: 15-03-131781).

50  
51  
52 Participants gave written informed consent.  
53  
54  
55  
56  
57  
58  
59  
60



## Context

The ERS received primary and secondary care referrals for those with cardiovascular disease, overweight/obesity, mental health issues, metabolic disease, and musculoskeletal, respiratory and neurological conditions. Previous analysis (n=2233) reported a significant increase in self-reported PA for those who adhered, with being aged  $\geq 55$  years a predictor of successful engagement.<sup>24</sup> Scheme design was based on the Transtheoretical Model,<sup>25 26</sup> (Figure 1). Staff held an industry standard exercise referral qualification.

### Figure 1: Scheme Process

The study took place in two of nine leisure centres providing the ERS. Referrals to these leisure centres were representative of the demographic spectrum of participants. This included a broad adult age range, males and females, and a range of economic circumstances and medical conditions. All those referred to the two leisure centres during May and June 2013 (n=102) were eligible to take part.

## Patient and Public Involvement

Previous quantitative ERS performance analysis informed the study. Participants were not involved in study design. A results summary was available for study participants.

## Sample

1  
2  
3 Early sampling of participants was by convenience.<sup>27</sup> All those invited to attend initial  
4 consultations during the first two weeks of the recruitment period (n=25) received an  
5 invitation to participate. During initial telephone contact, ERS staff informed referrals that the  
6 study consisted of two semi-structured interviews about their ERS experience. The first was  
7 conducted prior to starting, the second later in the 24-week period. Postal information was  
8 sent to interested referrals, who signed and returned the consent form to register for the study.  
9 ERS staff arranged interviews and the researcher had no access to personal details until  
10 consent was given. Participants were informed that the researcher was an employee of the  
11 scheme provider and that a research objective was to improve service delivery. There was no  
12 obligation to take part and ERS involvement was not dependent on this decision. Eight of  
13 those initially invited agreed to participate. Later sampling was purposeful, based on  
14 emergent themes from earlier initial interviews.<sup>28</sup> Recruitment continued until the emergence  
15 of new concepts from initial interview analysis ceased.

### 32 **Data collection and analysis**

33  
34  
35  
36  
37 Data were collected via two longitudinal semi-structured interviews conducted between May  
38 and December 2013, which were audio-recorded and transcribed verbatim. CLH, a PhD  
39 student who was employed by the scheme provider as a strategic manager, conducted all  
40 interviews. Prior to undertaking interviews, CLH completed qualitative interviewing training  
41 and received mentoring from LJA, an experienced qualitative researcher. Initial interviews  
42 took place in private immediately prior to initial consultations at the participants' leisure  
43 venue. One pilot interview using a semi-structured guide was conducted and analysed by  
44 CLH and LJA. The guide remained unchanged and the pilot interview deemed suitable for  
45 study inclusion. Initial interviews focused on circumstances leading to referral and

1  
2  
3 perceptions of the ERS. Second interviews, which took place 12-20 weeks later, focused on  
4 participation or non-participation experiences. Participants checked attendance at sessions  
5 with scheme staff and reported this during second interviews. Individual interviews ranged in  
6 length from 22-62 minutes (median 48 minutes). Participants checked transcripts for  
7 accuracy. Detailed field notes focused on participants' social context, the quality of the  
8 interaction and potential researcher bias due to insider knowledge.  
9  
10  
11  
12  
13  
14  
15  
16  
17

18 Interviews were subject to thematic analysis using the framework approach.<sup>29</sup> The use of  
19 pseudonyms ensured anonymity. CLH and LJA familiarised themselves with transcripts  
20 through reading and rereading, and by listening to audio-recordings to check accuracy. Using  
21 manual processes and Microsoft Excel to organise data, they openly recorded preliminary  
22 concepts and patterns for three transcripts. After discussion between all authors (n=4), the  
23 establishment of agreed codes formed an initial analytical framework. Three more transcripts  
24 were analysed before refinement and finalising of the framework to allow comparison within  
25 and across all cases. The creation of a matrix allowed for the mapping and exploration of  
26 connections within and between participants and categories. During interpretation, analysis  
27 went beyond descriptions of individual cases to develop themes identifying and offering  
28 possible explanations for types of ERS experience. Participants did not provide feedback on  
29 findings, but themes were checked with ERS staff via a workshop.  
30  
31  
32  
33  
34  
35  
36  
37  
38  
39  
40  
41  
42  
43  
44  
45

## 46 **RESULTS**

### 47 **Participant characteristics**

48  
49  
50  
51  
52  
53  
54  
55  
56  
57  
58  
59  
60

Fifteen referrals took part in initial interviews and 11 completed both interviews. Only participants who completed both interviews were included in the final analysis (Table 1). Four participants did not complete the second interview. Two participants responded stating that they had dropped out and did not have time for the interview due to a new job or caring commitments. The other two did not respond.

Table 1: Participant Characteristics

| Participant Pseudonym | Age Group (years) | Gender | Primary reason for referral | Source of referral     | Participation status* | Overarching theme |
|-----------------------|-------------------|--------|-----------------------------|------------------------|-----------------------|-------------------|
| Alice                 | 70+               | Female | CVD Secondary Prevention    | Cardiac Rehabilitation | Adherer               | Success           |
| Amy                   | 20-29             | Female | Overweight/obesity          | Primary care           | Adherer               |                   |
| Julie                 | 50-59             | Female | Overweight/obesity          | Primary care           | Adherer               |                   |
| Patricia              | 60-69             | Female | Overweight/obesity          | Primary care           | Adherer               |                   |
| Brian                 | 60-69             | Male   | CVD Secondary Prevention    | Cardiac Rehabilitation | Adherer               | Struggle          |
| Margaret              | 60-69             | Female | Mental Health               | Primary care           | Dropout               |                   |
| Peter                 | 50-59             | Male   | CVD Secondary Prevention    | Cardiac Rehabilitation | Adherer               |                   |
| Paul                  | 50-59             | Male   | Overweight/obesity          | Primary care           | Non- starter          | Defeat            |
| Jackie                | 40-49             | Female | Overweight/obesity          | Primary care           | Non- starter          |                   |
| Dorothy               | 60-69             | Female | Musculoskeletal             | Primary care           | Dropout               |                   |
| Dan                   | 50-59             | Male   | Mental Health               | Primary care           | Dropout               |                   |

\***Non-starter:** attended initial consultation, but no exercise sessions

**Dropout:** attended initial consultation and some exercise sessions but informed researcher they had stopped attending

**Adherer:** attended initial consultation and informed researcher they were still attending exercise sessions

## Overarching themes

Three overarching themes emerged, each conveying a different referral experience (Figure 2).

Figure 2: Thematic analysis of ERS experiences

1  
2  
3  
4  
5 The first was *success*, with motivated participants focused on health outcomes. The second  
6  
7 described a *struggle*, with some level of short-term success. Cyclical changes in  
8  
9 circumstances such as health status, and overall concerns regarding continued engagement  
10  
11 were evident. The final theme centred on *defeat*, where ill health, social anxiety and/or poor  
12  
13 experiences of participation made engagement difficult or unsuccessful. Short excerpts from  
14  
15 transcripts give an indication of typical experience, with [...] signifying the joining of  
16  
17 different sections. A participant case study illustrates each theme in more depth.  
18  
19  
20  
21

### 22 **Success: increased physical activity and improved health**

23  
24  
25  
26 *Success* illustrated how the ERS worked very well for some, with sub-themes of improved  
27  
28 health, increased PA and support. These participants tended to have had positive early  
29  
30 experiences of sport and were motivated to improve or maintain health. Participation was  
31  
32 mainly enjoyable, with peer and/or staff support being important attendance facilitators. Julie  
33  
34 highlighted the ‘*very helpful*’ staff and how ‘*enjoying Pilates has motivated me to be coming*  
35  
36 *more*’. Although personal goals, for example weight loss, were not always as anticipated, the  
37  
38 experience was rewarding and there was a celebration of success. There was an expectation  
39  
40 that activity would continue via signposted exit route sessions or independent exercise: ‘*I will*  
41  
42 *just come on my own. They (other participants) have finished but they still come at the same*  
43  
44 *time*’ (Patricia).  
45  
46  
47  
48  
49

50 Illustrating this theme is Alice. She had completed cardiac rehabilitation prior to starting:  
51  
52  
53  
54  
55  
56  
57  
58  
59  
60

1  
2  
3 Alice: *'I loved sport, I used to cycle to work, then I started doing yoga, but I also like aqua*  
4 *fit, and I love walking around. I couldn't believe when I had a heart attack. [...] You have this*  
5 *fear, I don't walk anywhere where I'm going to fall down and nobody's going to see us. [...] I*  
6 *feel confident about the scheme. I'll move straight on (from cardiac rehabilitation). [...] I'm*  
7 *overweight; I've got to lose at least a stone. [...] You've got to use it or lose it, I've always*  
8 *believed that.'*

9  
10  
11  
12  
13  
14  
15  
16  
17  
18 During her second interview, Alice reported 91% attendance and was very positive. Staff and  
19  
20 social support were important in encouraging adherence:  
21  
22

23  
24 Alice: *'I've really enjoyed it, I feel much healthier again, and I've made loads of new friends.*  
25 *I think the most important thing is I feel that I have got my confidence back. It has definitely*  
26 *lifted all that was frightening. [...] I haven't lost weight but I haven't put any on. I am more*  
27 *content with my life again. More realistic. [...] I love the class, and I like the talking. Yes the*  
28 *mouth exercises, they are very good. [...] It makes you feel as though you belong in a club.*  
29 *[...] (Staff member) is full of fun as well. She does push you along.'*  
30  
31  
32  
33  
34  
35  
36  
37  
38

39  
40 Within the theme of success, there were elements of struggle. Before starting the scheme,  
41  
42 there were concerns about how perceived physical limitations and personal situations would  
43  
44 affect attendance. Amy discussed self-esteem issues and how she made *'sure that I have got*  
45 *someone with us because I don't feel very confident going out by myself.'*  
46  
47  
48  
49

50 Participants described using social comparisons<sup>30</sup> to make judgments about their personal  
51  
52 situation. Both upward and downward comparisons positively reinforced participation. For  
53  
54 example, Amy developed positive views of older people's fitness, which encouraged her to  
55  
56  
57  
58  
59  
60

1  
2  
3 do more: *'I've seen what they have got their treadmills on and I'm thinking, I'm only lower*  
4 *than them, I'd best turn it up'*. Overall there was a steady improvement in perceptions about  
5 ability to be active, and the associated health and social benefits. Enjoyment was both an  
6 important facilitator of success and a positive outcome of participation.  
7  
8  
9  
10

### 11 12 13 **Struggle: cyclical needs and scheme dependency** 14

15  
16  
17  
18 *Struggle* illustrated how the ERS worked in the short-term for some but highlighted different  
19 approaches, or additional measures, may be necessary to encourage sustained increases in  
20 PA. Sub-themes of cyclical needs, scheme dependency and multiple barriers indicated that  
21 this theme was more complex than *success*. Resulting experiences were more divergent, with  
22 difficult life circumstances and/or complex health conditions influencing participation. For  
23 these participants, frequently life events had caused a breakdown of their social order (e.g.,  
24 the death of a loved one or loss of a job), and the ERS enabled a regaining of structure and  
25 control. Strugglers perceived the scheme as a way to get lives *'back on track'* (Margaret).  
26 This, when combined with complex health problems, meant disengagement could be difficult.  
27 Brian, a widower with depression and a history of myocardial infarction, had: *'trouble with*  
28 *my left foot, I am partially blind now, diabetic.'* He reported a lack of confidence to move on,  
29 indicating scheme dependency: *'I'm letting (staff member) set my programme. I might jigger*  
30 *myself up. The scheme is fine. It's ideal. I've been asking him can I stop in it?'* Margaret, in  
31 contrast, felt her mental health had improved so she no longer needed to attend but  
32 recognised that this was cyclical, and that she may need future support.  
33  
34  
35  
36  
37  
38  
39  
40  
41  
42  
43  
44  
45  
46  
47  
48  
49  
50  
51

52 Within *struggle*, participants reported increased PA and health gains *'I feel 100% better'*  
53 (Brian); however, longer-term positive continuation post-scheme appeared unlikely.  
54  
55  
56  
57  
58  
59  
60

1  
2  
3  
4  
5 Peter's experiences illustrate the theme of struggle. For him, social circumstance was  
6 particularly influential. His attendance was sporadic (63% of potential sessions). He was  
7 unemployed at his first interview and saw a potential return to work as an adherence barrier:  
8  
9  
10

11  
12  
13 Peter: *Well I don't know exactly what is going to happen. I'll just see what it is and how it*  
14 *goes. If I enjoy it, I will stick with it as long as I can. [...] If I find work, I would stop*  
15 *attending.'*  
16  
17  
18  
19  
20

21  
22 During his second interview, it was difficult to gauge his enthusiasm due to his natural  
23 reticence: *'I come because it is there and it's available. Or I would be just moping around the*  
24 *house all day doing nothing.'* His intermittent attendance was due to a work-related course  
25 and a short period of employment. Cost was an issue:  
26  
27  
28  
29  
30

31  
32  
33 Peter: *'It's pretty hard because I have got no wages coming in. I've just got Job Seekers*  
34 *Allowance and that doesn't even pay my mortgage, so money is really tight. I did have a little*  
35 *insurance but that money has now run out and I really am starting to struggle. It is fairly*  
36 *cheap, but saying that, when you haven't got a lot of money coming in then it is a lot of*  
37 *money to pay out.'*  
38  
39  
40  
41  
42  
43  
44  
45

46 Peter stated he would continue to attend until he found employment, when he *'might try and*  
47 *come with my partner and play badminton once or twice a week.'* His enthusiasm for this  
48 appeared to be lacking and therefore long-term change in PA was unlikely.  
49  
50  
51  
52  
53

#### 54 **Defeat: inappropriate referral or poor participation experience**

55  
56  
57  
58  
59  
60



1  
2  
3  
4  
5 The third theme was *defeat*. Within this, subthemes of poor health, social anxiety and poor  
6 participation experience were apparent. Some participants never attended an exercise session,  
7 prevented by ill health (Paul and Dan) or social anxieties: *'The thought of coming here on my*  
8 *own, with nobody else, I like staying in my comfort zone'* (Jackie). Poor participation  
9 experience (Dorothy) indicated weaknesses in scheme delivery. Defeated by the barriers  
10 faced, they felt ostracised from participation. There was a sense of failure and, for some,  
11 shame. For these participants the ERS did not work.  
12  
13  
14  
15  
16  
17  
18  
19  
20  
21

22 Illustrating this theme is Dorothy, who had been previously referred to the scheme on two  
23 occasions. The first time she completed the scheme but did not continue via signposted exit  
24 route activities because her friend stopped attending. On the second occasion, she dropped  
25 out due to a foot problem. She did not like PA:  
26  
27  
28  
29  
30  
31  
32

33 Dorothy: *'At school I wasn't very good at PE. I never liked it very much, only did what I had*  
34 *to do. [...] I've been to be the scheme twice before; other than that I don't think I really did*  
35 *any exercise. [...] I've got a real problem with my back. I'm sort of hoping that if I do exercise*  
36 *it will strengthen the muscles in my back and I will be able to do more things.'*  
37  
38  
39  
40  
41  
42  
43

44 During her second interview, Dorothy described how she felt unable to cope with the sessions  
45 due to back pain:  
46  
47  
48  
49

50 Dorothy: *'I did tell her that I'd got a back problem and I was waiting for these injections, but*  
51 *she said 'well start'. [...] I was quite disappointed because I couldn't do much of what they*  
52  
53  
54  
55  
56  
57  
58  
59  
60

1  
2  
3 *was asking us to do. It was a class and it was where you do sort of aerobics first and then go*  
4 *to all these sort of stations. I found it really hard.'*  
5  
6  
7  
8

9 Discussing one session, she described a lack of staff support: *'She just said do what you can*  
10 *do and if you can't do whatever it is, just keep your feet moving.'* This contrasted with her  
11 experience with another staff member: *'She knew when you couldn't do it and she would give*  
12 *you an alternative. So she was really good but she was only there once.'*  
13  
14  
15  
16  
17  
18  
19

20 The scheme had a system of telephone support, but in Dorothy's case, implementation  
21 appeared to be lacking:  
22  
23  
24  
25

26 Dorothy: *'I phoned in several times to explain. I left messages but nobody got back to me. I*  
27 *think if maybe someone had phoned me back and said 'well come in and you can do the*  
28 *things a different way' it might have encouraged me to go back in again.'*  
29  
30  
31  
32  
33  
34

35 Dorothy raised delivery issues and highlighted the need for a better understanding of protocol  
36 implementation by staff. She was very upset by her experience, stating *'It makes you feel like*  
37 *a failure sometimes. I don't think I could go to the doctors and say 'I failed last time can you*  
38 *refer me again'?' Her experience was complex however. She felt unable to access the peer*  
39 support described by those who engaged successfully. During her first interview, Dorothy  
40 described how she found socialising difficult: *'I'm not really a good mixer so I find it quite*  
41 *hard.'* During her second interview, she reported that the group felt unwelcoming: *'She was*  
42 *really nice, one lady that was there. Apart from her, I don't think any of the others were*  
43 *welcoming or said anything. Like I said they got into their little twos or threes or whatever.'*  
44  
45  
46  
47  
48  
49  
50  
51  
52  
53  
54  
55  
56  
57  
58  
59  
60

1  
2  
3 Lack of social confidence contributed to dropout, although in Dorothy's case it does not  
4 appear to have been the primary influence. Defeat illustrates how some participants may  
5 struggle to access the peer support identified by others as an important facilitator for  
6 adherence.  
7  
8  
9  
10

## 11 12 13 **DISCUSSION**

14  
15  
16  
17  
18 The purpose of this study was to understand experiences of an ERS to give insight regarding  
19 what worked, or did not work, to encourage engagement, and for whom. This is important  
20 because existing literature questions ERS effectiveness,<sup>20 22</sup> without exploring adequately  
21 how to focus implementation to better personalise support. Three overarching themes  
22 emerged. First, *success*, with engaged participants focused on health outcomes. Second,  
23 *struggle*, short-term success but with concerns regarding continued engagement. Finally,  
24 *defeat*, where illness, social anxiety, and/or poor participation experience prevented  
25 engagement. Within the identified themes, similarities in factors affecting engagement and  
26 non-engagement were evident. For those who experienced some measure of success, there  
27 were shared enablers such as peer support, achievable and enjoyable activities, staff  
28 knowledge and staff/peer support. These are reflected to some extent in systematic review  
29 findings of engagement facilitators for ERS.<sup>31</sup> What this paper adds is insight regarding  
30 whom these facilitators worked best for within the ERS context. Specifically, participants  
31 who were able to access social support, had positive previous experiences of PA, and were  
32 motivated by improving or maintaining their health. Participants often described success in  
33 terms of improvements in mental health and self-esteem, perceptions about ability to be  
34 active, and the social benefits of participation. Social and psychological benefits were  
35 perceived to be as meaningful as measurable physical health benefits, similar to other  
36  
37  
38  
39  
40  
41  
42  
43  
44  
45  
46  
47  
48  
49  
50  
51  
52  
53  
54  
55  
56  
57  
58  
59  
60

1  
2  
3 reported findings.<sup>32</sup> Success illustrated the value of exercise referral for some participants  
4 with non-communicable diseases. This was not universal however. The study highlighted  
5 unequal abilities to access the scheme, along with differing support requirements, which  
6 suggests the need to provide more tailored support for some. The issues identified are  
7 reflective of other studies examining barriers to PA irrespective of the presence of a medical  
8 condition.<sup>7 11</sup>

15  
16  
17  
18 Adults with complex lives embarked on the ERS with expectations of positive changes in  
19 health. While ERS delivery training courses include elements of behaviour change, the  
20 training does not appear to be sufficient preparation for staff to deal with identified complex  
21 psychological barriers. Indeed the high levels of responsibilities that fitness professionals  
22 undertake has led to concerns about adequacy of education and training.<sup>33</sup> Further  
23 development of behaviour change elements within national occupational standards for  
24 promoting PA could partially address matters. This represents only part of the problem  
25 however. This study illustrates how a ‘one size fits all’ model does not adequately cater for  
26 the complex range of referrals received. Indeed, the existing model of universal referral to a  
27 common programme is potentially setting such schemes up to fail. This is because current  
28 measures of success are typically quantified as uptake and adherence,<sup>34-36</sup> and/or self-reported  
29 changes in PA.<sup>15 37</sup> Regardless of suitability, providers may feel obliged to ‘shoehorn’  
30 referrals into schemes if the continuation of funding is reliant on achievement of such key  
31 performance indicators. This type of approach fails to consider the complex health and social  
32 circumstances of ERS participants, leading to an inadequate focus on what works, and for  
33 whom.

1  
2  
3 In the case of ERS, there is a need to understand what different approaches are required to  
4 support change for those experiencing struggle or defeat. The themes presented in this study  
5 may resonate with ERS commissioners and providers and should encourage reflection of  
6 approaches to support. *Success* can reinforce good practice, while highlighting potential  
7 improvements. *Struggle* can initiate conversations about alternative delivery for those who  
8 require more or different support in order to make sustained behaviour change. This may  
9 include mechanisms for cyclical support to reengage those who relapse into inactivity and  
10 'weaning' to reduce ERS dependency. Finally, *defeat* can initiate conversations about  
11 appropriate referrals, improvements to existing provision and alternative models of care. At a  
12 broad level, approaches may include support from multiple agencies,<sup>38</sup> the use of  
13 technology,<sup>39</sup> or broader system change.<sup>40</sup>

14  
15  
16  
17  
18  
19  
20  
21  
22  
23  
24  
25  
26  
27  
28  
29 Readers can make choices about whether the identified themes resonate with their own  
30 intuitive understanding of such situations, which arguably can improve practice through the  
31 process of naturalistic generalization.<sup>41</sup> That said, it is not known whether the experiences of  
32 those who declined to participate or dropped out of the study were different to those who took  
33 part. For example, we previously established that those under 55 years of age were less likely  
34 to engage in the scheme in the first instance and more likely to dropout when they did.<sup>24</sup>  
35  
36  
37  
38  
39  
40  
41  
42 However, only one participant from this demographic completed a second interview.  
43  
44  
45  
46  
47  
48  
49  
50  
51  
52  
53  
54  
55  
56  
57  
58  
59  
60  
61  
62  
63  
64  
65  
66  
67  
68  
69  
70  
71  
72  
73  
74  
75  
76  
77  
78  
79  
80  
81  
82  
83  
84  
85  
86  
87  
88  
89  
90  
91  
92  
93  
94  
95  
96  
97  
98  
99  
100  
101  
102  
103  
104  
105  
106  
107  
108  
109  
110  
111  
112  
113  
114  
115  
116  
117  
118  
119  
120  
121  
122  
123  
124  
125  
126  
127  
128  
129  
130  
131  
132  
133  
134  
135  
136  
137  
138  
139  
140  
141  
142  
143  
144  
145  
146  
147  
148  
149  
150  
151  
152  
153  
154  
155  
156  
157  
158  
159  
160  
161  
162  
163  
164  
165  
166  
167  
168  
169  
170  
171  
172  
173  
174  
175  
176  
177  
178  
179  
180  
181  
182  
183  
184  
185  
186  
187  
188  
189  
190  
191  
192  
193  
194  
195  
196  
197  
198  
199  
200  
201  
202  
203  
204  
205  
206  
207  
208  
209  
210  
211  
212  
213  
214  
215  
216  
217  
218  
219  
220  
221  
222  
223  
224  
225  
226  
227  
228  
229  
230  
231  
232  
233  
234  
235  
236  
237  
238  
239  
240  
241  
242  
243  
244  
245  
246  
247  
248  
249  
250  
251  
252  
253  
254  
255  
256  
257  
258  
259  
260  
261  
262  
263  
264  
265  
266  
267  
268  
269  
270  
271  
272  
273  
274  
275  
276  
277  
278  
279  
280  
281  
282  
283  
284  
285  
286  
287  
288  
289  
290  
291  
292  
293  
294  
295  
296  
297  
298  
299  
300  
301  
302  
303  
304  
305  
306  
307  
308  
309  
310  
311  
312  
313  
314  
315  
316  
317  
318  
319  
320  
321  
322  
323  
324  
325  
326  
327  
328  
329  
330  
331  
332  
333  
334  
335  
336  
337  
338  
339  
340  
341  
342  
343  
344  
345  
346  
347  
348  
349  
350  
351  
352  
353  
354  
355  
356  
357  
358  
359  
360  
361  
362  
363  
364  
365  
366  
367  
368  
369  
370  
371  
372  
373  
374  
375  
376  
377  
378  
379  
380  
381  
382  
383  
384  
385  
386  
387  
388  
389  
390  
391  
392  
393  
394  
395  
396  
397  
398  
399  
400  
401  
402  
403  
404  
405  
406  
407  
408  
409  
410  
411  
412  
413  
414  
415  
416  
417  
418  
419  
420  
421  
422  
423  
424  
425  
426  
427  
428  
429  
430  
431  
432  
433  
434  
435  
436  
437  
438  
439  
440  
441  
442  
443  
444  
445  
446  
447  
448  
449  
450  
451  
452  
453  
454  
455  
456  
457  
458  
459  
460  
461  
462  
463  
464  
465  
466  
467  
468  
469  
470  
471  
472  
473  
474  
475  
476  
477  
478  
479  
480  
481  
482  
483  
484  
485  
486  
487  
488  
489  
490  
491  
492  
493  
494  
495  
496  
497  
498  
499  
500  
501  
502  
503  
504  
505  
506  
507  
508  
509  
510  
511  
512  
513  
514  
515  
516  
517  
518  
519  
520  
521  
522  
523  
524  
525  
526  
527  
528  
529  
530  
531  
532  
533  
534  
535  
536  
537  
538  
539  
540  
541  
542  
543  
544  
545  
546  
547  
548  
549  
550  
551  
552  
553  
554  
555  
556  
557  
558  
559  
560  
561  
562  
563  
564  
565  
566  
567  
568  
569  
570  
571  
572  
573  
574  
575  
576  
577  
578  
579  
580  
581  
582  
583  
584  
585  
586  
587  
588  
589  
590  
591  
592  
593  
594  
595  
596  
597  
598  
599  
600  
601  
602  
603  
604  
605  
606  
607  
608  
609  
610  
611  
612  
613  
614  
615  
616  
617  
618  
619  
620  
621  
622  
623  
624  
625  
626  
627  
628  
629  
630  
631  
632  
633  
634  
635  
636  
637  
638  
639  
640  
641  
642  
643  
644  
645  
646  
647  
648  
649  
650  
651  
652  
653  
654  
655  
656  
657  
658  
659  
660  
661  
662  
663  
664  
665  
666  
667  
668  
669  
670  
671  
672  
673  
674  
675  
676  
677  
678  
679  
680  
681  
682  
683  
684  
685  
686  
687  
688  
689  
690  
691  
692  
693  
694  
695  
696  
697  
698  
699  
700  
701  
702  
703  
704  
705  
706  
707  
708  
709  
710  
711  
712  
713  
714  
715  
716  
717  
718  
719  
720  
721  
722  
723  
724  
725  
726  
727  
728  
729  
730  
731  
732  
733  
734  
735  
736  
737  
738  
739  
740  
741  
742  
743  
744  
745  
746  
747  
748  
749  
750  
751  
752  
753  
754  
755  
756  
757  
758  
759  
760  
761  
762  
763  
764  
765  
766  
767  
768  
769  
770  
771  
772  
773  
774  
775  
776  
777  
778  
779  
780  
781  
782  
783  
784  
785  
786  
787  
788  
789  
790  
791  
792  
793  
794  
795  
796  
797  
798  
799  
800  
801  
802  
803  
804  
805  
806  
807  
808  
809  
810  
811  
812  
813  
814  
815  
816  
817  
818  
819  
820  
821  
822  
823  
824  
825  
826  
827  
828  
829  
830  
831  
832  
833  
834  
835  
836  
837  
838  
839  
840  
841  
842  
843  
844  
845  
846  
847  
848  
849  
850  
851  
852  
853  
854  
855  
856  
857  
858  
859  
860  
861  
862  
863  
864  
865  
866  
867  
868  
869  
870  
871  
872  
873  
874  
875  
876  
877  
878  
879  
880  
881  
882  
883  
884  
885  
886  
887  
888  
889  
890  
891  
892  
893  
894  
895  
896  
897  
898  
899  
900  
901  
902  
903  
904  
905  
906  
907  
908  
909  
910  
911  
912  
913  
914  
915  
916  
917  
918  
919  
920  
921  
922  
923  
924  
925  
926  
927  
928  
929  
930  
931  
932  
933  
934  
935  
936  
937  
938  
939  
940  
941  
942  
943  
944  
945  
946  
947  
948  
949  
950  
951  
952  
953  
954  
955  
956  
957  
958  
959  
960  
961  
962  
963  
964  
965  
966  
967  
968  
969  
970  
971  
972  
973  
974  
975  
976  
977  
978  
979  
980  
981  
982  
983  
984  
985  
986  
987  
988  
989  
990  
991  
992  
993  
994  
995  
996  
997  
998  
999  
1000

1  
2  
3 and delivery of the ERS studied. Potential biases were explored by the use of reflective field  
4 notes and in group discussions with all authors. Particular attention was paid to how existing  
5 knowledge may have affected discussion with participants and interpretation of results. That  
6 said, while in the past an outsider, objective stance was considered desirable in research terms  
7 to guard against identification, insider insight can now be considered legitimate and desirable  
8 due to the potential for increased empathy with participants.<sup>43</sup> After reflection, it was felt that  
9 researcher knowledge contributed to the interpretation of data.  
10  
11  
12  
13  
14  
15  
16  
17  
18  
19

## 20 CONCLUSION

21  
22  
23  
24 Overall, the data support arguments that ERSs can disproportionately engage with, and  
25 benefit, some disadvantaged groups. Importantly they can successfully engage those with  
26 non-communicable diseases, and positively affect health and wellbeing. The value of current  
27 ERSs appears to be for those with social confidence and previous positive experiences of PA.  
28 Conversely, such schemes may fail those who struggle to access social support due to varying  
29 health condition demands, or complex or impaired social circumstances. For those who are  
30 unable to adhere, feelings of ostracism and failure may further exacerbate outcome  
31 differentials. Ultimately, even programmes that target disadvantaged sub-groups (in the case  
32 of ERSs, those with non-communicable diseases) appear at risk of reinforcing inequalities.  
33 This study therefore highlights a need for services and systems that better provide for those  
34 with dynamic health and social circumstances.  
35  
36  
37  
38  
39  
40  
41  
42  
43  
44  
45  
46  
47  
48  
49

50 **Acknowledgements:** Many thanks to ERS staff at Blyth Valley Arts and Leisure for helping  
51 with recruitment and organisation of interviews.  
52  
53  
54  
55  
56  
57  
58  
59  
60

1  
2  
3 **Author Contributions:** CLH contributed to the study design, data collection, data analysis  
4 and preparation of the final document. EO contributed to data analysis and preparation of the  
5 final document. CDR contributed to study design, data analysis and preparation of the final  
6 document. LJA contributed to study design, data analysis and preparation of the final  
7 document. All authors contributed to this paper and approved the final version.  
8  
9  
10  
11  
12  
13  
14

15 **Funding:** Blyth Valley Arts and Leisure was one of two providers of the exercise referral  
16 scheme studied and provided funding for a PhD to evaluate the service.  
17  
18  
19  
20  
21

22 **Competing interests:** CLH is a former employee of Blyth Valley Arts and Leisure and  
23 completed a PhD that was funded by the aforementioned company.  
24  
25  
26  
27

28 **Participant consent:** obtained  
29  
30  
31  
32

33 **Ethics approval:** Northumbria University Faculty of Health and Life Sciences Ethics  
34 Committee (Ref: 15-03-131781)  
35  
36  
37  
38

39 **Provenance and peer review:** Not commissioned; externally peer reviewed.  
40  
41  
42  
43

44 **Data sharing statement:** No additional data are available.  
45  
46  
47

## 48 REFERENCES

49  
50  
51  
52  
53  
54  
55  
56  
57  
58  
59  
60

- 1  
2  
3 1. Lee IM, Shiroma EJ, Lobelo F, et al. Effect of physical inactivity on major non-  
4  
5 communicable diseases worldwide: an analysis of burden of disease and life expectancy.  
6  
7 *Lancet* 2012;380:219-29. doi: 10.1016/S0140-6736(12)61031-9  
8  
9
- 10 2. Ding D, Lawson KD, Kolbe-Alexander TL, et al. The economic burden of physical  
11  
12 inactivity: a global analysis of major non-communicable diseases. *Lancet* 2016;388:1311-24.  
13  
14 doi: 10.1016/S0140-6736(16)30383-X  
15  
16
- 17 3. World Health Organisation. *Global action plan for the prevention and control of non-*  
18  
19 *communicable diseases 2013-2020*. Geneva: World Health Organisation, 2013.  
20  
21 [http://africahealthforum.afro.who.int/IMG/pdf/global\\_action\\_plan\\_for\\_the\\_prevention\\_and\\_c](http://africahealthforum.afro.who.int/IMG/pdf/global_action_plan_for_the_prevention_and_c)  
22  
23 [ontrol\\_of\\_ncds\\_2013-2020.pdf](http://africahealthforum.afro.who.int/IMG/pdf/global_action_plan_for_the_prevention_and_c). (Accessed: 05 March 2018)  
24  
25
- 26 4. World Health Organisation. *Global status report on noncommunicable diseases, 2014*.  
27  
28 Geneva: World Health Organisation, 2014.  
29  
30 [http://apps.who.int/iris/bitstream/10665/148114/1/9789241564854\\_eng.pdf](http://apps.who.int/iris/bitstream/10665/148114/1/9789241564854_eng.pdf) (Accessed: 05  
31  
32 March 2018).  
33  
34
- 35 5. Eime RM, Charity MJ, Harvey JT, et al. Participation in sport and physical activity:  
36  
37 associations with socio-economic status and geographical remoteness. *BMC Public Health*  
38  
39 2015;15:434. doi: 10.1186/s12889-015-1796-0  
40  
41
- 42 6. Sievi NA, Senn O, Brack T, et al. Impact of comorbidities on physical activity in COPD.  
43  
44 *Respirology* 2015;20(3):413-18. doi: 10.1111/resp.12456  
45  
46
- 47 7. Picorelli AMA, Pereira LSM, Pereira DS, et al. Adherence to exercise programs for older  
48  
49 people is influenced by program characteristics and personal factors: a systematic review.  
50  
51 *Journal of Physiotherapy* 2014;60(3):151-56. doi: 10.1037/0022-006X.51.3.390  
52  
53  
54  
55  
56  
57  
58  
59



- 1  
2  
3 8. Allender S, Cowburn G, Foster C. Understanding participation in sport and physical  
4 activity among children and adults: a review of qualitative studies. *Health Educ Res*  
5 2006;21(6):826-35. doi: 10.1093/her/cyl063  
6  
7  
8  
9  
10 9. Borodulin K, Sipila N, Rahkonen O, et al. Socio-demographic and behavioral variation in  
11 barriers to leisure-time physical activity. *Scand J Public Health* 2016;44(1):62-69. doi:  
12 10.1177/1403494815604080  
13  
14  
15  
16  
17 10. Kern ML, Reynolds CA, Friedman HS. Predictors of Physical Activity Patterns Across  
18 Adulthood: A Growth Curve Analysis. *Pers Soc Psychol Bulletin* 2010. doi:  
19 10.1177/0146167210374834  
20  
21  
22  
23  
24 11. Pan S, Cameron C, DesMeules M, et al. Individual, social, environmental, and physical  
25 environmental correlates with physical activity among Canadians: a cross-sectional study.  
26 *BMC Public Health* 2009;9(1):21. doi: 10.1186/1471-2458-9-21  
27  
28  
29  
30  
31 12. Zunft H-JF, Friebe D, Seppelt B, et al. Perceived benefits and barriers to physical activity  
32 in a nationally representative sample in the European Union. *Public Health Nutr*  
33 1999;2(Supplement 1a):153-60. doi: 10.1017/S1368980099000208  
34  
35  
36  
37  
38 13. Sowden S, Raine R. Running along parallel lines: how political reality impedes the  
39 evaluation of public health interventions. A case study of exercise referral schemes in  
40 England. *J Epidemiol Community Health* 2008;62(9):835 - 41. doi:10.1136/jech.2007.069781  
41  
42  
43  
44  
45 14. Murphy SM, Edwards RT, Williams N, et al. An evaluation of the effectiveness and cost  
46 effectiveness of the National Exercise Referral Scheme in Wales, UK: a randomised  
47 controlled trial of a public health policy initiative. *J Epidemiol Community Health*  
48 2012;66(8):745-53. doi: 10.1136/jech-2011-200689  
49  
50  
51  
52  
53  
54  
55  
56  
57  
58  
59  
60

- 1  
2  
3 15. Sorenson J, Kragstrup J, Stovgaard T, et al. Exercise on Prescription: a randomized study  
4 on the effect of counseling vs counseling and supervised exercise. *Scand J Med Sci Sports*  
5 2008;18(3). doi: 10.1111/j.1600-0838.2008.00811.x  
6  
7  
8  
9  
10 16. Gusi N, Reyes M, Gonzalez-Guerrero J, et al. Cost-utility of a walking programme for  
11 moderately depressed, obese, or overweight elderly women in primary care: a randomised  
12 controlled trial. *BMC Public Health* 2008;8(1):231. doi: 10.1186/1471-2458-8-231  
13  
14  
15  
16  
17 17. Gallegos-Carrillo K, García-Peña C, Salmerón J, et al. Brief Counseling and Exercise  
18 Referral Scheme: A Pragmatic Trial in Mexico. *Am J Prev Med* 2017;52(2):249-59.  
19 doi:10.1016/j.amepre.2016.10.021  
20  
21  
22  
23  
24 18. Public Health England. *Identifying what works for local physical inactivity interventions*.  
25 London, Public Health England, 2014.  
26  
27  
28 [https://www.gov.uk/government/uploads/system/uploads/attachment\\_data/file/374560/What](https://www.gov.uk/government/uploads/system/uploads/attachment_data/file/374560/What_worksv1_2.pdf)  
29 [worksv1\\_2.pdf](https://www.gov.uk/government/uploads/system/uploads/attachment_data/file/374560/What_worksv1_2.pdf). (Accessed: 05 March 2018)  
30  
31  
32  
33 19. Oliver EJ, Hanson CL, Lindsey IA, et al. Exercise on referral: evidence and complexity at  
34 the nexus of public health and sport policy. *International Journal of Sport Policy and Politics*  
35 2016;1-6. doi: 10.1186/1471-2458-9-21  
36  
37  
38  
39  
40 20. Campbell F, Holmes M, Everson-Hock E, et al. A systematic review and economic  
41 evaluation of exercise referral schemes in primary care: a short report. *Health Technol Assess*  
42 2015;19(60):1-87. doi: 10.3310/hta19600  
43  
44  
45  
46  
47 21. National Institute for Health and Care Excellence. *Physical activity; exercise referral*  
48 *schemes*. National Institute for Health and Care Excellence, 2014.  
49  
50  
51 [https://www.nice.org.uk/guidance/ph54/resources/physical-activity-exercise-referral-](https://www.nice.org.uk/guidance/ph54/resources/physical-activity-exercise-referral-schemes-pdf-1996418406085)  
52 [schemes-pdf-1996418406085](https://www.nice.org.uk/guidance/ph54/resources/physical-activity-exercise-referral-schemes-pdf-1996418406085) (Accessed: 05 March2018).  
53  
54  
55  
56  
57  
58  
59  
60

- 1  
2  
3 22. Pavey TG, Taylor A, Fox K, et al. Effect of exercise referral schemes in primary care on  
4 physical activity and improving health outcomes: systematic review and meta-analysis. *BMJ*  
5 2011;343. doi: 10.1136/bmj.d6462  
6  
7  
8  
9  
10 23. Tong A, Sainsbury P, Craig J. Consolidated criteria for reporting qualitative research  
11 (COREQ): a 32-item checklist for interviews and focus groups. *Int J Qual Health Care*  
12 2007;19(6):349-57. doi: 10.1093/intqhc/mzm042  
13  
14  
15  
16  
17 24. Hanson CL, Allin LJ, Ellis JG, et al. An evaluation of the efficacy of the exercise on  
18 referral scheme in Northumberland, UK: association with physical activity and predictors of  
19 engagement. A naturalistic observation study. *BMJ Open* 2013;3(8). doi: 10.1136/bmjopen-  
20 2013-002849  
21  
22  
23  
24  
25  
26 25. Prochaska JO, Marcus BH. *The transtheoretical model: Applications to exercise*. In:  
27 Dishman RK, ed. *Advances in exercise adherence*. Champaign, IL, England: Human Kinetics  
28 1994:161-80.  
29  
30  
31  
32  
33 26. Prochaska JO, DiClemente CC. Stages and processes of self-change of smoking: Toward  
34 an integrative model of change. *J Consult and Clin Psychol* 1983;Vol 51(3):390-95. doi:  
35 10.1037/0022-006X.51.3.390  
36  
37  
38  
39  
40 27. Marshall MN. Sampling for qualitative research. *Fam Pract* 1996;13(6):522-26.  
41  
42  
43  
44  
45  
46 28. Strauss AL. *Qualitative analysis for social scientists*. Cambridge: Cambridge University  
47 Press, 1987.  
48  
49  
50 29. Spencer L, Ritchie J, Lewis J, et al. *Quality in qualitative evaluation: a framework for*  
51 *assessing research evidence*. National Centre for Social Research, 2003.  
52  
53  
54  
55  
56  
57  
58  
59  
60

1  
2  
3 <http://dera.ioe.ac.uk/21069/2/a-quality-framework-tcm6-38740.pdf> (Accessed: 05 March  
4  
5 2018).

6  
7  
8 30. Festinger L. A Theory of Social Comparison Processes. *Human Relations* 1954;7(2):117-  
9  
10 40. doi: 10.1177/001872675400700202

11  
12  
13 31. Morgan F, Battersby A, Weightman AL, et al. Adherence to exercise referral schemes by  
14  
15 participants – what do providers and commissioners need to know? A systematic review of  
16  
17 barriers and facilitators. *BMC Public Health* 2016;16(1):1-11 doi: 10.1186/s12889-016-2882-  
18  
19 7

20  
21  
22 32. Pentecost C, Taket A. Understanding exercise uptake and adherence for people with  
23  
24 chronic conditions: a new model demonstrating the importance of exercise identity, benefits  
25  
26 of attending and support. *Health Educ Res* 2011;26(5):908-22. doi: 10.1093/her/cyr052  
27

28  
29 33. De Lyon ATC, Neville RD, Armour KM. The Role of Fitness Professionals in Public  
30  
31 Health: A Review of the Literature. *Quest* 2017;69(3):313-30. doi:  
32  
33 10.1080/00336297.2016.1224193  
34

35  
36 34. Dugdill L, Graham R, McNair F. Exercise referral: the public health panacea for physical  
37  
38 activity promotion? A critical perspective of exercise referral schemes; their development and  
39  
40 evaluation. *Ergonomics* 2005;48:1390-410. doi: 10.1080/00140130500101544  
41

42  
43 35. Gidlow C, Johnston LH, Crone D, et al. Socio-demographic patterning of referral, uptake  
44  
45 and attendance in Physical Activity Referral Schemes. *J Public Health* 2007;29(2):107-13.  
46  
47 doi:10.1093/pubmed/fdm002  
48

49  
50 36. Sowden S, Breeze E, Barber J, et al. Do general practices provide equitable access to  
51  
52 physical activity interventions? *Br J Gen Pract* 2008;58:e1-e8. doi: 10.3399/bjgp08X342237  
53  
54

- 1  
2  
3 37. Duda JL, Williams GC, Ntoumanis N, et al. Effects of a standard provision versus an  
4  
5 autonomy supportive exercise referral programme on physical activity, quality of life and  
6  
7 well-being indicators: a cluster randomised controlled trial. *Int J Behav Nutr Phys Act*  
8  
9 2014;11(1):1-15. doi: 10.1186/1479-5868-11-10  
10  
11  
12 38. Sugai G, Horner RH, Dunlap G, et al. Applying positive behavior support and functional  
13  
14 behavioral assessment in schools. *J Posit Behav Interv* 2000;2(3):131-43. doi:  
15  
16 10.1177/109830070000200302  
17  
18  
19 39. Gallagher R, Gallagher P, Zhang L, et al. Technology Use and Confidence in Cardiac  
20  
21 Rehabilitation Patients. *Heart Lung Circ* 2016;25:S333. doi: 10.1016/j.hlc.2016.06.791  
22  
23  
24 40. Michie S, van Stralen MM, West R. The behaviour change wheel: A new method for  
25  
26 characterising and designing behaviour change interventions. *Implement Sci* 2011;6(1):42.  
27  
28 doi: 10.1186/1748-5908-6-42  
29  
30  
31 41. Stake RE, Trumbull DJ. Naturalistic generalizations. *Review Journal of Philosophy and*  
32  
33 *Social Science* 1982;7(1):1-12.  
34  
35  
36 42. Creswell JW, Miller DL. Determining validity in qualitative inquiry. *Theory into practice*  
37  
38 2000;39(3):124-30. doi: 10.1207/s15430421tip3903  
39  
40  
41 43. Gair S. Feeling Their Stories: Contemplating Empathy, Insider/Outsider Positionings, and  
42  
43 Enriching Qualitative Research. *Qual Health Res* 2012;22(1):134-43. doi:  
44  
45 10.1177/1049732311420580  
46  
47  
48  
49  
50  
51  
52  
53  
54  
55  
56  
57  
58  
59  
60

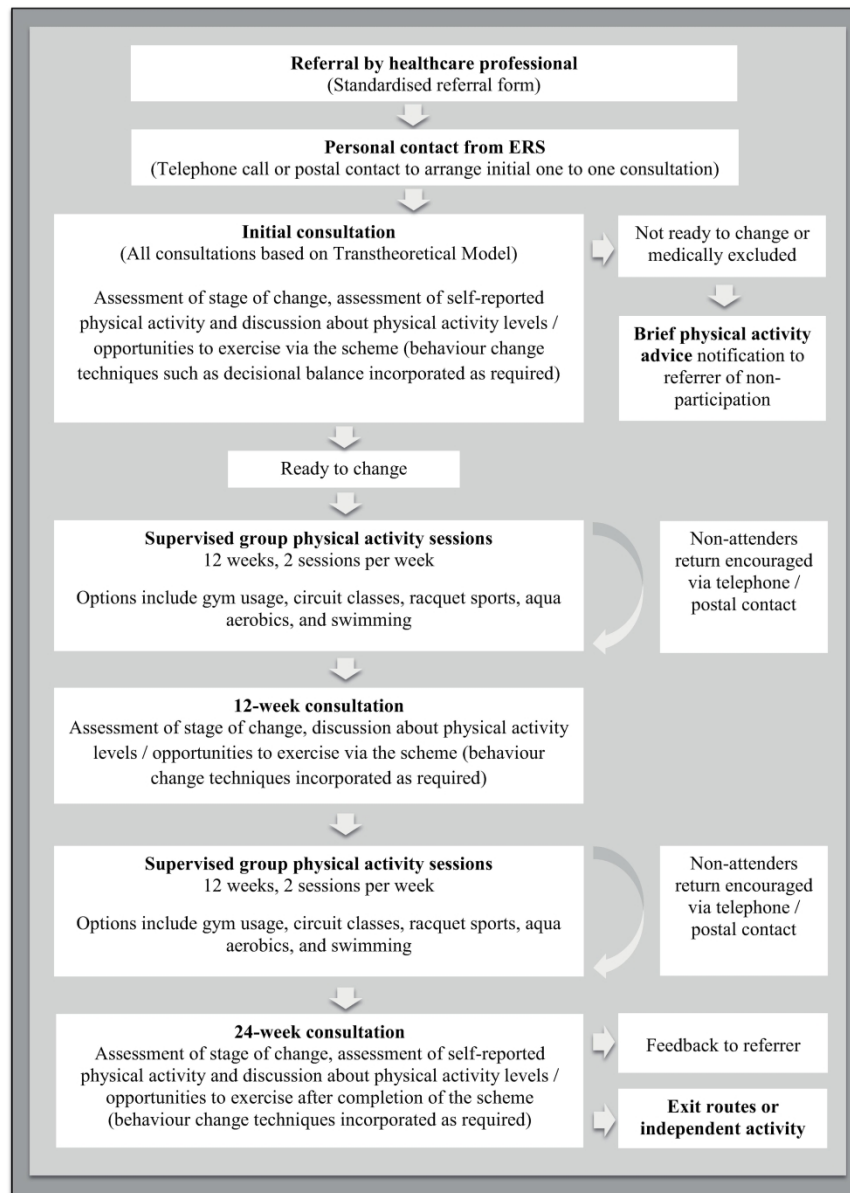

Figure 1: Scheme Process

266x370mm (300 x 300 DPI)

1  
2  
3  
4  
5  
6  
7  
8  
9  
10  
11  
12  
13  
14  
15  
16  
17  
18  
19  
20  
21  
22  
23  
24  
25  
26  
27  
28  
29  
30  
31  
32  
33  
34  
35  
36  
37  
38  
39  
40  
41  
42  
43  
44  
45  
46  
47  
48  
49  
50  
51  
52  
53  
54  
55  
56  
57  
58  
59  
60

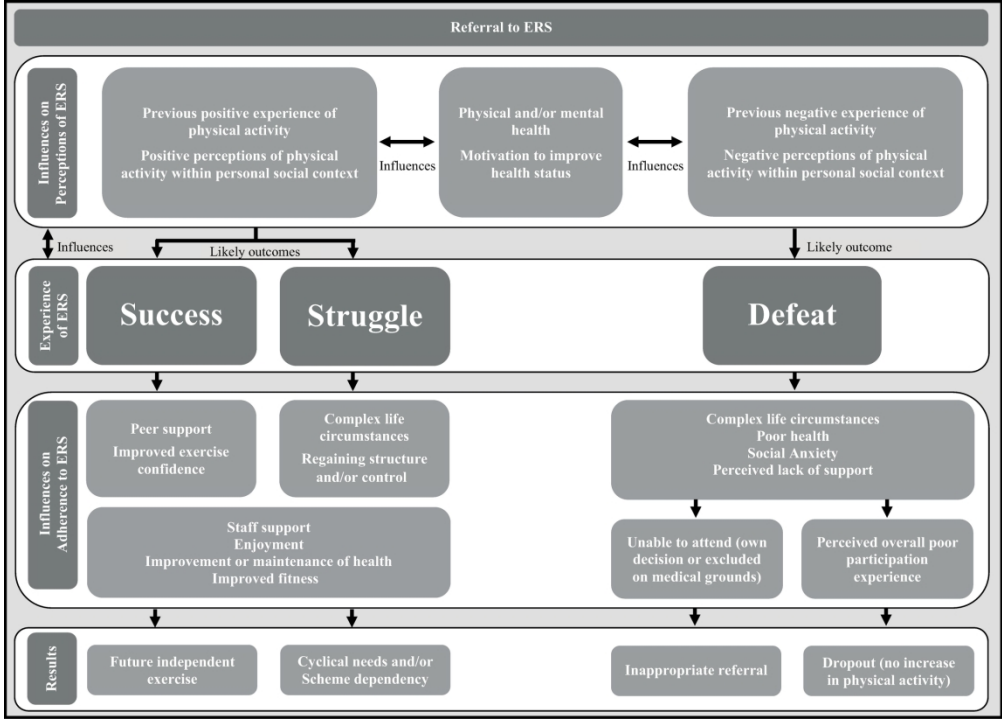

Figure 2: Thematic analysis of ERS experiences

206x148mm (300 x 300 DPI)

**COREQ GUIDELINES REPORTING CHECKLIST: Understanding engagement and non-engagement: A longitudinal qualitative study of participant experiences of an exercise referral scheme**

| No                                             | Item                                     | Guide questions/description                                                                                                                                     | Information                                                                                                                                                                 | Reported in manuscript |
|------------------------------------------------|------------------------------------------|-----------------------------------------------------------------------------------------------------------------------------------------------------------------|-----------------------------------------------------------------------------------------------------------------------------------------------------------------------------|------------------------|
| <b>Domain 1: Research team and reflexivity</b> |                                          |                                                                                                                                                                 |                                                                                                                                                                             |                        |
| Personal Characteristics                       |                                          |                                                                                                                                                                 |                                                                                                                                                                             |                        |
| 1                                              | Interviewer/facilitator:                 | Which author/s conducted the interview or focus group?                                                                                                          | CLH                                                                                                                                                                         | √                      |
| 2                                              | Credentials                              | What were the researcher's credentials?                                                                                                                         | CLH PhD student and experienced in working in intervention studied. LJA experienced qualitative researcher                                                                  | √                      |
| 3                                              | Occupation                               | What was their occupation at the time of the study?                                                                                                             | PhD student and strategic manager in the ERS provider organisation                                                                                                          | √                      |
| 4                                              | Gender                                   | Was the researcher male or female?                                                                                                                              | Female (referred to as she)                                                                                                                                                 | √                      |
| 5                                              | Experience and training                  | What experience or training did the researcher have?                                                                                                            | CLH: Qualitative research training and support from experienced researcher (LJA)                                                                                            | √                      |
| Relationship with participants                 |                                          |                                                                                                                                                                 |                                                                                                                                                                             |                        |
| 6                                              | Relationship established                 | Was a relationship established prior to study commencement?                                                                                                     | No, participants were approached by ERS staff to explain the study and seek consent.                                                                                        | √                      |
| 7                                              | Participant knowledge of the interviewer | What did the participants know about the researcher? <i>e.g. personal goals, reasons for doing the research</i>                                                 | Participants were informed of researcher's employment status and that the research aimed to improved service delivery                                                       | √                      |
| 8                                              | Interviewer characteristics              | What characteristics were reported about the interviewer/facilitator? <i>e.g. Bias, assumptions, reasons and interests in the research topic</i>                | Acknowledgement of potential bias due to insider knowledge. Interest in service improvement and employment status of interviewer disclosed in study invitation information. | √                      |
| <b>Domain 1: Study design</b>                  |                                          |                                                                                                                                                                 |                                                                                                                                                                             |                        |
| Theoretical framework                          |                                          |                                                                                                                                                                 |                                                                                                                                                                             |                        |
| 9                                              | Methodological orientation and Theory    | What methodological orientation was stated to underpin the study? <i>e.g. grounded theory, discourse analysis, ethnography, phenomenology, content analysis</i> | Thematic analysis using the framework approach                                                                                                                              | √                      |
| Participant selection                          |                                          |                                                                                                                                                                 |                                                                                                                                                                             |                        |
| 10                                             | Sampling                                 | How were participants selected? <i>e.g. purposive, convenience, consecutive,</i>                                                                                | Initially convenience from a defined group, then purposive                                                                                                                  | √                      |



|    |                                        |                                                                                          |                                                                                                               |   |
|----|----------------------------------------|------------------------------------------------------------------------------------------|---------------------------------------------------------------------------------------------------------------|---|
|    |                                        | <i>snowball</i>                                                                          |                                                                                                               |   |
| 11 | Method of approach                     | How were participants approached? <i>e.g. face-to-face, telephone, mail, email</i>       | By telephone by scheme provider                                                                               | √ |
| 12 | Sample size                            | How many participants were in the study?                                                 | 15 initially but only 11 completed both interviews                                                            | √ |
| 13 | Non-participation                      | How many people refused to participate or dropped out? Reasons?                          | Of initial invitees 13/25 refused. Of 15 initial participants, 4 dropped out. (no response n=2, too busy n=2) | √ |
|    | Setting                                |                                                                                          |                                                                                                               |   |
| 14 | Setting of data collection             | Where was the data collected? <i>e.g. home, clinic, workplace</i>                        | Leisure centre where ERS was attended                                                                         | √ |
| 15 | Presence of non-participants           | Was anyone else present besides the participants and researchers?                        | No, interviews were conducted in private                                                                      | √ |
| 16 | Description of sample                  | What are the important characteristics of the sample? <i>e.g. demographic data, date</i> | Gender, age group, medical reason for referral and date range for interviews reported                         | √ |
|    | Data collection                        |                                                                                          |                                                                                                               |   |
| 17 | Interview guide                        | Were questions, prompts, guides provided by the authors? Was it pilot tested?            | Semi-structured interview guide used. Pilot tested                                                            | √ |
| 18 | Repeat interviews                      | Were repeat interviews carried out? If yes, how many?                                    | Yes, one further interview after 12-20 weeks                                                                  | √ |
| 19 | Audio/visual recording                 | Did the research use audio or visual recording to collect the data?                      | Yes, the interviews were audio recorded                                                                       | √ |
| 20 | Field notes                            | Were field notes made during and/or after the interview or focus group?                  | Yes detailed field notes were made directly after interviews                                                  | √ |
| 21 | Duration                               | What was the duration of the interviews or focus groups?                                 | Range and median length reported: 22-62 minutes (median 48 minutes)                                           | √ |
| 22 | Data saturation                        | Was data saturation discussed?                                                           | Recruitment stopped when no new themes were emerging                                                          | √ |
| 23 | Transcripts returned                   | Were transcripts returned to participants for comment and/or correction?                 | Transcripts were checked by participants.                                                                     | √ |
|    | <b>Domain 3: analysis and findings</b> |                                                                                          |                                                                                                               |   |
|    | Data analysis                          |                                                                                          |                                                                                                               |   |
| 24 | Number of data coders                  | How many data coders coded the data?                                                     | N=2 (CLH and LJA) independently<br>N=4 in total at data workshops                                             | √ |
| 25 | Description of the coding tree         | Did authors provide a description of the coding tree?                                    | Yes figure 2 visually describes the coding tree                                                               | √ |
| 26 | Derivation of themes                   | Were themes identified in advance or derived from the data?                              | Identified from data                                                                                          | √ |
| 27 | Software                               | What software, if applicable,                                                            | No software used, data                                                                                        | √ |

|    |                              |                                                                                                                                   |                                                                                                                                                                                                                                                                                                                               |   |
|----|------------------------------|-----------------------------------------------------------------------------------------------------------------------------------|-------------------------------------------------------------------------------------------------------------------------------------------------------------------------------------------------------------------------------------------------------------------------------------------------------------------------------|---|
|    |                              | was used to manage the data?                                                                                                      | analysed manually using an excel spreadsheet                                                                                                                                                                                                                                                                                  |   |
| 28 | Participant checking         | Did participants provide feedback on the findings?                                                                                | No, but themes were checked with ERS staff at a workshop.                                                                                                                                                                                                                                                                     | √ |
|    | Reporting                    |                                                                                                                                   |                                                                                                                                                                                                                                                                                                                               |   |
| 29 | Quotations presented         | Were participant quotations presented to illustrate the themes / findings? Was each quotation identified? e.g. participant number | Yes, participants identified using a pseudonym                                                                                                                                                                                                                                                                                | √ |
| 30 | Data and findings consistent | Was there consistency between the data presented and the findings?                                                                | Themes were illustrated by participant quotations                                                                                                                                                                                                                                                                             | √ |
| 31 | Clarity of major themes      | Were major themes clearly presented in the findings?                                                                              | Three major experience themes were identified: success, struggle and defeat                                                                                                                                                                                                                                                   | √ |
| 32 | Clarity of minor themes      | Is there a description of diverse cases or discussion of minor themes?                                                            | Minor themes identified within each major theme:<br>For success: improved health, increased PA, enjoyment and support<br>For struggle: scheme dependency, multiple barriers and cyclical needs<br>For defeat: inappropriate referral, poor participation experience, social anxiety.<br>Diverse cases discussed within themes | √ |

# BMJ Open

## How do participant experiences and characteristics influence engagement in exercise referral? A qualitative longitudinal study of a scheme in Northumberland, United Kingdom.

|                                 |                                                                                                                                                                                                                                                                                                                                                                                                                                                                                                                                                                                                                                                                                                                                         |
|---------------------------------|-----------------------------------------------------------------------------------------------------------------------------------------------------------------------------------------------------------------------------------------------------------------------------------------------------------------------------------------------------------------------------------------------------------------------------------------------------------------------------------------------------------------------------------------------------------------------------------------------------------------------------------------------------------------------------------------------------------------------------------------|
| Journal:                        | <i>BMJ Open</i>                                                                                                                                                                                                                                                                                                                                                                                                                                                                                                                                                                                                                                                                                                                         |
| Manuscript ID                   | bmjopen-2018-024370.R1                                                                                                                                                                                                                                                                                                                                                                                                                                                                                                                                                                                                                                                                                                                  |
| Article Type:                   | Research                                                                                                                                                                                                                                                                                                                                                                                                                                                                                                                                                                                                                                                                                                                                |
| Date Submitted by the Author:   | 09-Oct-2018                                                                                                                                                                                                                                                                                                                                                                                                                                                                                                                                                                                                                                                                                                                             |
| Complete List of Authors:       | Hanson, Coral; Edinburgh Napier University, School of Health and Social Care; Durham University, Wolfson Research Institute for Health and Wellbeing Physical Activity Special Interest Group<br>Oliver, Emily; Durham University, Department of Sport and Exercise Sciences;; Durham University, Wolfson Research Institute for Health and Wellbeing Physical Activity Special Interest Group<br>Dodd-Reynolds, Caroline; Durham University, Department of Sport and Exercise Sciences; Durham University, Wolfson Research Institute for Health and Wellbeing Physical Activity Special Interest Group<br>Allin, Linda; Northumbria University, Department of Sport, Exercise and Rehabilitation, Faculty of Health and Life Sciences |
| <b>Primary Subject Heading</b>: | Public health                                                                                                                                                                                                                                                                                                                                                                                                                                                                                                                                                                                                                                                                                                                           |
| Secondary Subject Heading:      | Rehabilitation medicine, Qualitative research                                                                                                                                                                                                                                                                                                                                                                                                                                                                                                                                                                                                                                                                                           |
| Keywords:                       | PUBLIC HEALTH, QUALITATIVE RESEARCH, Health policy < HEALTH SERVICES ADMINISTRATION & MANAGEMENT, PRIMARY CARE, PHYSICAL ACTIVITY, REHABILITATION MEDICINE                                                                                                                                                                                                                                                                                                                                                                                                                                                                                                                                                                              |
|                                 |                                                                                                                                                                                                                                                                                                                                                                                                                                                                                                                                                                                                                                                                                                                                         |

SCHOLARONE™  
Manuscripts

1  
2  
3 1 **How do participant experiences and characteristics influence engagement in exercise**  
4  
5 2 **referral? A qualitative longitudinal study of a scheme in Northumberland, United**  
6  
7 3 **Kingdom.**  
8  
9 4

10  
11 5 Coral L Hanson <sup>1,2</sup>, (corresponding author), Emily J Oliver <sup>2,3</sup>, Caroline J Dodd-Reynolds <sup>2,</sup>  
12  
13 6 <sup>3</sup>, Linda J Allin <sup>4</sup>  
14  
15

16  
17  
18 8 <sup>1</sup> School of Health and Social Care, Edinburgh Napier University, Sighthill Campus,  
19  
20 9 Edinburgh, EH11 4DN, UK. Email: c.hanson@napier.ac.uk Tel: 0131 455 3457  
21  
22

23  
24 11 <sup>2</sup> Wolfson Research Institute for Health and Wellbeing Physical Activity Special Interest  
25  
26 12 Group, Durham University, Durham, UK.  
27  
28

29  
30  
31 14 <sup>3</sup> Department of Sport and Exercise Sciences, Durham University, Durham, UK.  
32  
33

34  
35 16 <sup>4</sup> Department of Sport, Exercise and Rehabilitation, Faculty of Health and Life Sciences,  
36  
37 17 University of Northumbria, Newcastle-upon-Tyne, UK  
38  
39

40  
41  
42 19 Word count: 3991  
43  
44

45  
46 21 Key Words: Public Health, Qualitative Research, Health Policy, Primary Care, Rehabilitation  
47 22 Medicine, Physical Activity  
48  
49

50  
51  
52  
53  
54  
55  
56  
57  
58  
59  
60

1  
2  
3 1 **ABSTRACT**

4 2 **Objectives:** Exercise referral schemes are internationally widespread. This study aimed to  
5  
6  
7 3 gain an insight into differential engagement through understanding participant experiences of  
8  
9 4 patients referred by healthcare professionals to one such scheme in the United Kingdom  
10

11  
12 5  
13  
14 6 **Design:** The study employed a qualitative longitudinal approach using semi-structured  
15  
16 7 interviews, with results reported using COREQ guidelines.  
17  
18

19 8  
20  
21  
22 9 **Setting:** Two leisure centres providing an ‘emerging best-practice’ exercise referral scheme  
23  
24 10 in northeast England.  
25  
26

27 11  
28  
29  
30 12 **Participants:** Referred patients (n = 11) who had not yet commenced the scheme, were  
31  
32 13 recruited on a voluntary basis. Seven females and four males, with a range of non-  
33  
34 14 communicable diseases: cardiovascular disease, mental health issues, diabetes,  
35  
36 15 overweight/obesity and musculoskeletal problems participated.  
37  
38

39 16  
40  
41  
42 17 **Intervention:** 24-week, twice weekly supervised exercise sessions and three one-to-one  
43  
44 18 assessments (pre-scheme, 12-weeks and 24-weeks) for patients referred from primary and  
45  
46 19 secondary care.  
47  
48

49 20  
50  
51  
52 21 **Primary outcome measures:** Two longitudinal semi-structured interviews, prior to  
53  
54 22 commencement and 12-20 weeks later, were thematically analysed using the framework  
55  
56 23 approach. Analysis comprised seven stages: transcription, familiarisation, coding,  
57  
58

1  
2  
3 1 development and application of an analytical framework, charting data using a matrix, and  
4  
5 2 interpretation of data. Interpretation went beyond descriptions of individual cases to develop  
6  
7 3 themes, which identified and offered possible explanations for differing participant  
8  
9 4 experiences.

10  
11  
12 5  
13  
14  
15 6 **Results:** Three overarching themes emerged. First, 'success', with engaged participants  
16  
17 7 focused on health outcomes and reported increases in physical activity. Second, 'struggle',  
18  
19 8 with short-term success but concerns regarding continued engagement. Participants reported  
20  
21 9 scheme dependency and cyclical needs. Finally, 'defeat', where ill health, social anxiety,  
22  
23 10 and/or poor participation experience made engagement difficult.

24  
25  
26 11  
27  
28  
29 12 **Conclusion:** Some success in engaging those with non-communicable diseases was reported,  
30  
31 13 resulting in positive effects on health and wellbeing. The study highlights complexity within  
32  
33 14 exercise referral schemes, and inequality of access for those with challenging health and  
34  
35 15 social circumstances. Improved, or different, behaviour change support is required for  
36  
37 16 referrals finding engagement difficult.

## 1 ARTICLE SUMMARY

### 2 Strengths and limitations of this study

- 3
- 4
- 5
- 6
- 7
- 8
- 9
- 10
- 11
- 12
- 13
- 14
- 15
- 16
- 17
- 18
- 19
- 20
- 21
- 22
- 23
- 24
- 25
- 26
- 27
- 28
- 29
- 30
- 31
- 32
- 33
- 34
- 35
- 36
- 37
- 38
- 39
- 40
- 41
- 42
- 43
- 44
- 45
- 46
- 47
- 48
- 49
- 50
- 51
- 52
- 53
- 54
- 55
- 56
- 57
- 58
- 59
- 60
- This study advances the predominantly quantitative literature on participant adherence to exercise referral by using a longitudinal qualitative design to gain a deeper understanding of the experience of patients with non-communicable diseases referred to an exercise referral scheme (ERS).
  - The study provides insight into the complexity of ERS engagement and the experiences of a group that has been little researched; those who did not successfully engage with the ERS.
  - The study was unable to engage some of the original participants in second interviews, meaning that the experiences of some who may have been least well-served by the intervention are unknown.
  - The sample of participants were recruited from only one, albeit large-scale, ERS, meaning that findings relate to this particular scheme and sample.
  - Qualitative interviews can only provide information on what participants recall or are prepared to reveal about their perceived experiences within a particular interview context, meaning that the potential for recall bias is always present.

## 1 INTRODUCTION

2  
3 Regular physical activity (PA) has a beneficial effect on cardiovascular disease risk, diabetes,  
4 some cancers and all-cause mortality.<sup>1</sup> The global cost of inactivity to health-care in 2013  
5 was estimated to be 53.8 billion international dollars<sup>2</sup> and therefore increasing PA levels is a  
6 high priority to reduce non-communicable diseases.<sup>3</sup> Participation in PA has been widely  
7 described in terms of demography, with inequalities apparent.<sup>4</sup> For example, there is an  
8 inverse relationship between PA and indicators of disadvantage such as socio-economic  
9 status<sup>5</sup> and multiple co-morbidities.<sup>6</sup> In order to have the greatest impact, PA promotion  
10 initiatives must therefore consider the context, and barriers and facilitators to engagement  
11 specifically in disadvantaged populations.

12  
13 Emerging evidence indicates that current PA programmes can fail to engage or retain more  
14 disadvantaged participants. Lower socioeconomic status, and increasing number of health  
15 conditions, medications and depressive symptoms have been reported to negatively predict  
16 adherence.<sup>7</sup> Factors affecting participation are complex, however, with personal and social  
17 factors such as positive childhood PA experience and social support for PA known to  
18 positively influence activity levels.<sup>8-12</sup> Understanding how and why existing programmes  
19 engage, or do not engage, participants with differing personal circumstance can inform future  
20 equitable practice.

21  
22 An exercise referral scheme (ERS) is one option for health professionals to promote PA for  
23 those with non-communicable diseases.<sup>13</sup> Such schemes are internationally widespread,  
24 existing for example, in the United Kingdom (UK),<sup>14</sup> Denmark,<sup>15</sup> Spain<sup>16</sup> and Mexico.<sup>17</sup> In  
25 the UK, leisure providers usually deliver ERSs, directing participants into 10-24 weeks of



1 supervised PA. The present study focused on one large scale ERS identified as emerging best  
2 practice by Public Health England.<sup>18</sup> Although ERSs are broadly aimed at those with non-  
3 communicable diseases, there is limited understanding of effective targeting. Exploring  
4 whether sub-groups of participants are more or less likely to engage therefore has value in  
5 informing practice.<sup>19</sup> This is important because cost-effectiveness analyses indicate that ERSs  
6 need to reduce costs by 60%.<sup>20</sup> However, lack of evidence about effectiveness for participant  
7 sub-groups may have resulted in an underestimation of benefits. Indeed, the UK National  
8 Institute for Health and Care Excellence has identified a requirement to understand better  
9 what ERS elements work best and for whom.<sup>21</sup>

10  
11 To implement successful and equitable ERSs, there is a need to better understand who  
12 existing programmes work or do not work for. Demographic evidence contributes some  
13 knowledge;<sup>20 22</sup> but a more in-depth analytical approach is required to increase understanding  
14 of other factors influencing engagement. This longitudinal qualitative study aimed to gain an  
15 insight into differential engagement through understanding participant experiences of an  
16 ERS.

## 17 18 **METHODS**

19  
20 The study employed longitudinal qualitative design to explore experiences of participants  
21 referred to the Northumberland ERS. Results were reported using the COREQ guidelines.<sup>23</sup>  
22 Overarching themes, encompassing a variety of participants with differing social contexts and  
23 motives for referral, were established. Northumbria University Faculty of Health and Life  
24 Sciences Ethics Committee granted study ethical approval (Ref: 15-03-131781). Participants  
25 gave written informed consent.

1  
2  
3 1  
4  
56 2 **Context**  
78 3  
9

10 4 The ERS received primary and secondary care referrals for those with cardiovascular disease,  
11  
12 5 overweight/obesity, mental health issues, metabolic disease, and musculoskeletal, respiratory  
13  
14 6 and neurological conditions. Previous analysis (n=2233) reported a significant increase in  
15  
16 7 self-reported PA for those who adhered, with being aged  $\geq 55$  years a predictor of successful  
17  
18 8 engagement.<sup>24</sup> Scheme design was based on the Transtheoretical Model.<sup>25 26</sup> It consisted of  
19  
20 9 three one-to-one consultations and 24 weeks of twice-weekly PA sessions (Figure 1). During  
21  
22 10 consultations, participants chose which PA sessions to attend. Those who did not attend  
23  
24 11 activity sessions for one week were contacted by telephone or post. Each ERS session cost  
25  
26 12 £3.40. Participants could purchase a discounted direct debit fitness and swimming  
27  
28 13 membership while taking part and after completion (£24.00/month). Staff held an industry  
29  
30 14 standard exercise referral qualification.  
31  
32  
33

34 15  
3536 16 **Figure 1: Scheme Process**  
3738 17  
39

40 18 The study took place in two of nine leisure centres providing the ERS. Referrals to these  
41  
42 19 leisure centres were representative of the demographic spectrum of participants. This  
43  
44 20 included a broad adult age range, males and females, and a range of economic circumstances  
45  
46 21 and medical conditions. All those referred to the two leisure centres during May and June  
47  
48 22 2013 (n=102) were eligible to take part.  
49  
50

51 23  
5253 24 **Patient and Public Involvement**  
5455 25  
56  
57  
58  
59

1 Previous binary logistic regression analysis of demographic and personal factors associated  
2 with engagement and adherence to the ERS<sup>24</sup> informed the study. Participants were not  
3 involved in study design. A results summary was available for study participants.

## 4 5 **Sample**

6  
7 The Northumberland ERS provided a convenient sample,<sup>-27</sup> which was easily accessible to  
8 CLH, given her employment. All those invited to attend initial consultations during the first  
9 two weeks of the recruitment period (n=25) received an invitation to participate. During  
10 initial telephone contact, ERS staff informed referrals that the study consisted of two semi-  
11 structured interviews about their ERS experience. The first was conducted prior to starting,  
12 the second later in the 24-week period. Postal information was sent to interested referrals,  
13 who signed and returned the consent form to register for the study. ERS staff arranged  
14 interviews and the researcher had no access to personal details until consent was given.  
15 Participants were informed that the researcher was an employee of the scheme provider and  
16 that a research objective was to improve service delivery. There was no obligation to take  
17 part and ERS involvement was not dependent on this decision. Eight of those initially invited  
18 agreed to participate. Later sampling was purposeful, based on developing themes (those with  
19 multiple medical conditions and referrals under 50 years old) from earlier initial interviews.<sup>28</sup>  
20 ERS staff were asked to invite referrals with only these characteristics to take part later in the  
21 study. Recruitment continued until no new –overarching themes developed from initial  
22 interview analysis.

## 23 24 **Data collection and analysis**

25

1  
2  
3 1 Data were collected via two longitudinal semi-structured interviews conducted between May  
4  
5 2 and December 2013, which were audio-recorded and transcribed verbatim. CLH, a PhD  
6  
7 3 student who was employed by the scheme provider as a strategic manager, conducted all  
8  
9 4 interviews. CLH had 15 years' experience of working for the ERS but was not involved in  
10  
11 5 delivery during the study. Prior to undertaking interviews, CLH completed qualitative  
12  
13 6 interviewing training and received mentoring from LJA, an experienced qualitative  
14  
15 7 researcher. Initial interviews took place in private immediately prior to initial consultations at  
16  
17 8 the participants' leisure venue. One pilot interview using a semi-structured guide  
18  
19 9 (supplementary file 1) was conducted and analysed by CLH and LJA. Topics covered  
20  
21 10 included PA history, motivators for referral, perceptions and expectations of the ERS, and  
22  
23 11 perceived barriers and facilitators to taking part. The guide remained unchanged and the pilot  
24  
25 12 interview deemed suitable for study inclusion. Initial interviews focused on circumstances  
26  
27 13 leading to referral and perceptions of the ERS. Second interviews, which took place 12-20  
28  
29 14 weeks later, focused on participation or non-participation experiences (supplementary file 2).  
30  
31 15 Participants checked attendance at sessions with scheme staff and reported this during second  
32  
33 16 interviews. Individual interviews ranged in length from 22-62 minutes (median 48 minutes).  
34  
35 17 Participants checked transcripts for accuracy. Detailed field notes focused on participants'  
36  
37 18 social context, the quality of the interaction and potential researcher bias due to insider  
38  
39 19 knowledge.

40  
41  
42  
43  
44 20  
45  
46 21 Interviews were subject to thematic analysis using the framework approach.<sup>29</sup> The use of  
47  
48 22 pseudonyms ensured anonymity. CLH and LJA familiarised themselves with transcripts  
49  
50 23 through reading and rereading, and by listening to audio-recordings to check accuracy. Using  
51  
52 24 manual processes and Microsoft Excel to organise data, they openly recorded preliminary  
53  
54 25 concepts and patterns for three transcripts. After discussion between all authors (n=4), the

1 establishment of agreed codes formed an initial analytical framework. Three more transcripts  
 2 were analysed before refinement and finalising of the framework to allow comparison within  
 3 and across all cases. The creation of a matrix allowed for the mapping and exploration of  
 4 connections within and between participants and categories. During interpretation, analysis  
 5 went beyond descriptions of individual cases to develop themes identifying and offering  
 6 possible explanations for types of ERS experience. Participants did not provide feedback on  
 7 findings, but themes were checked with ERS staff via a workshop.

## 9 RESULTS

### 11 Participant characteristics

13 Fifteen referrals took part in initial interviews and 11 completed both interviews. Only  
 14 participants who completed both interviews were included in the final analysis (Table 1).  
 15 Four participants did not complete the second interview. Two participants responded stating  
 16 that they had dropped out and did not have time for the interview due to a new job or caring  
 17 commitments. The other two did not respond. Three of the four were under 50 years old.

19 Table 1: Participant Characteristics

| Participant Pseudonym | Age Group (years) | Gender | Primary reason for referral | Source of referral     | Self-reported PA history           | Employment status | Participation status* | Overarching theme |
|-----------------------|-------------------|--------|-----------------------------|------------------------|------------------------------------|-------------------|-----------------------|-------------------|
| Alice                 | 70+               | Female | CVD Secondary Prevention    | Cardiac Rehabilitation | Previously very active, enjoyed PA | Retired           | Adherer               |                   |
| Amy                   | 20-29             | Female | Overweight/obesity          | Primary care           | Previously active, enjoyed PA      | Home-maker        | Adherer               | Success           |
| Julie                 | 50-59             | Female | Overweight/obesity          | Primary care           | Previously very active, enjoyed PA | Employed          | Adherer               |                   |

|          |       |        |                             |                           |                                                            |                                    |                               |          |
|----------|-------|--------|-----------------------------|---------------------------|------------------------------------------------------------|------------------------------------|-------------------------------|----------|
| Patricia | 60-69 | Female | Overweight/<br>obesity      | Primary care              | Previously active,<br>enjoyed PA                           | Retired                            | Adherer                       |          |
| Brian    | 60-69 | Male   | CVD Secondary<br>Prevention | Cardiac<br>Rehabilitation | Previously active,<br>enjoyed PA                           | Retired                            | Adherer                       |          |
| Margaret | 60-69 | Female | Mental Health               | Primary care              | Intermittently<br>active, enjoyed<br>PA but hated<br>sport | Retired                            | Dropout                       | Struggle |
| Peter    | 50-59 | Male   | CVD Secondary<br>Prevention | Cardiac<br>Rehabilitation | Previously active,<br>enjoyed PA                           | Un-<br>employed                    | Adherer                       |          |
| Paul     | 50-59 | Male   | Overweight/<br>obesity      | Primary care              | Previously active,<br>enjoyed PA                           | Receiving<br>disability<br>benefit | Medically<br>excluded         |          |
| Jackie   | 40-49 | Female | Overweight/<br>obesity      | Primary care              | Previously<br>inactive, disliked<br>PA                     | Carer                              | Non-<br>attender              | Defeat   |
| Dorothy  | 60-69 | Female | Musculoskeletal             | Primary care              | Previously<br>inactive, disliked<br>PA                     | Retired                            | Dropout                       |          |
| Dan      | 50-59 | Male   | Mental Health               | Primary care              | Previously active,<br>enjoyed PA                           | Employed                           | Dropout<br>(health<br>reason) |          |

\***Medically excluded:** attended initial consultation but was excluded from scheme participation due to medical reasons (physiological measures above scheme acceptance guidelines e.g. blood pressure  $\geq 180/100$  mmHg or resting heart rate  $\geq 100$  beats per minute)

**Non-attender:** attended initial consultation, but no exercise sessions

**Dropout:** attended initial consultation and some exercise sessions but informed researcher they had stopped attending

**Adherer:** attended initial consultation and informed researcher they were still attending exercise sessions

### Overarching themes

Three overarching themes emerged, each conveying a different referral experience (Figure 2).

Figure 2: Thematic analysis of ERS experiences

The first was *success*, with motivated participants focused on health outcomes. The second described a *struggle*, with some level of short-term success. Cyclical changes in circumstances such as health status, and overall concerns regarding continued engagement were evident. The final theme centred on *defeat*, where ill health, social anxiety and/or poor experiences of participation made engagement difficult or unsuccessful. Short excerpts from

1 transcripts give an indication of typical experience, with [...] signifying the joining of  
2 different sections. A participant case study illustrates each theme in more depth.

#### 3 4 **Success: increased physical activity and improved health**

5  
6 *Success* illustrated how the ERS worked very well for some, with sub-themes of improved  
7 health, increased PA and support. These participants tended to have had positive early  
8 experiences of sport and were motivated to improve or maintain health. Participation was  
9 mainly enjoyable, with peer and/or staff support being important attendance facilitators. Julie  
10 highlighted the ‘*very helpful*’ staff and how ‘*enjoying Pilates has motivated me to be coming*  
11 *more*’. Although personal goals, for example weight loss, were not always as anticipated, the  
12 experience was rewarding and there was a celebration of success. There was an expectation  
13 that activity would continue via signposted exit route sessions or independent exercise: ‘*I will*  
14 *just come on my own. They (other participants) have finished but they still come at the same*  
15 *time*’ (Patricia).

16  
17 Illustrating this theme is Alice. She had completed cardiac rehabilitation prior to starting:

18  
19 Alice: ‘*I loved sport, I used to cycle to work, then I started doing yoga, but I also like aqua*  
20 *fit, and I love walking around. I couldn't believe when I had a heart attack. [...] You have this*  
21 *fear, I don't walk anywhere where I'm going to fall down and nobody's going to see us. [...] I*  
22 *feel confident about the scheme. I'll move straight on (from cardiac rehabilitation). [...] I'm*  
23 *overweight; I've got to lose at least a stone. [...] You've got to use it or lose it, I've always*  
24 *believed that.*’

1  
2  
3  
4  
5  
6  
7  
8  
9  
10  
11  
12  
13  
14  
15  
16  
17  
18  
19  
20  
21  
22  
23  
24  
25  
26  
27  
28  
29  
30  
31  
32  
33  
34  
35  
36  
37  
38  
39  
40  
41  
42  
43  
44  
45  
46  
47  
48  
49  
50  
51  
52  
53  
54  
55  
56  
57  
58  
59  
60

1 During her second interview, Alice reported 91% attendance and was very positive. Staff and  
2 social support were important in encouraging adherence:

3  
4 Alice: *'I've really enjoyed it, I feel much healthier again, and I've made loads of new friends.*  
5 *I think the most important thing is I feel that I have got my confidence back. It has definitely*  
6 *lifted all that was frightening. [...] I haven't lost weight but I haven't put any on. I am more*  
7 *content with my life again. More realistic. [...] I love the class, and I like the talking. Yes the*  
8 *mouth exercises, they are very good. [...] It makes you feel as though you belong in a club.*  
9 *[...] (Staff member) is full of fun as well. She does push you along.'*

10  
11 Within the theme of success, there were elements of struggle. Before starting the scheme,  
12 there were concerns about how perceived physical limitations and personal situations would  
13 affect attendance. Amy discussed self-esteem issues and how she made *'sure that I have got*  
14 *someone with us because I don't feel very confident going out by myself.'*

15  
16 Participants described using social comparisons<sup>30</sup> to make judgments about their personal  
17 situation. Both upward and downward comparisons positively reinforced participation. For  
18 example, Amy developed positive views of older people's fitness, which encouraged her to  
19 do more: *'I've seen what they have got their treadmills on and I'm thinking, I'm only lower*  
20 *than them, I'd best turn it up'*. Overall there was a steady improvement in perceptions about  
21 ability to be active, and the associated health and social benefits. Enjoyment was both an  
22 important facilitator of success and a positive outcome of participation.

23  
24 **Struggle: cyclical needs and scheme dependency**

25



1  
2  
3 1 *Struggle* illustrated how the ERS worked in the short-term for some but highlighted different  
4  
5 2 approaches, or additional measures, may be necessary to encourage sustained increases in  
6  
7 3 PA. Sub-themes of cyclical needs, scheme dependency and multiple barriers indicated that  
8  
9 4 this theme was more complex than *success*. Resulting experiences were more divergent, with  
10  
11 5 difficult life circumstances and/or complex health conditions influencing participation. For  
12  
13 6 these participants, frequently life events had caused a breakdown of their social order (e.g.,  
14  
15 7 the death of a loved one or loss of a job), and the ERS enabled a regaining of structure and  
16  
17 8 control. Strugglers perceived the scheme as a way to get lives '*back on track*' (Margaret).  
18  
19 9 This, when combined with complex health problems, meant disengagement could be difficult.  
20  
21 10 Brian, a widower with depression and a history of myocardial infarction, had: '*trouble with*  
22  
23 11 *my left foot, I am partially blind now, diabetic.*' He reported a lack of confidence to move on,  
24  
25 12 indicating scheme dependency: '*I'm letting (staff member) set my programme. I might jiggle*  
26  
27 13 *myself up. The scheme is fine. It's ideal. I've been asking him can I stop in it?*' Margaret, in  
28  
29 14 contrast, felt her mental health had improved so she no longer needed to attend but  
30  
31 15 recognised that this was cyclical, and that she may need future support.  
32  
33  
34  
35  
36  
37  
38  
39  
40  
41  
42  
43

17 Within *struggle*, participants reported increased PA and health gains '*I feel 100% better*'  
18 (Brian); however, longer-term positive continuation post-scheme appeared unlikely.  
19

20 Peter's experiences illustrate the theme of struggle. For him, social circumstance was  
21 particularly influential. His attendance was sporadic (63% of potential sessions). He was  
22 unemployed at his first interview and saw a potential return to work as an adherence barrier:  
23

1  
2  
3 1 Peter: *Well I don't know exactly what is going to happen. I'll just see what it is and how it*  
4  
5 2 *goes. If I enjoy it, I will stick with it as long as I can. [...] If I find work, I would stop*  
6  
7 3 *attending.'*

8  
9 4  
10  
11 5 During his second interview, it was difficult to gauge his enthusiasm due to his natural  
12  
13 6 reticence: *'I come because it is there and it's available. Or I would be just moping around the*  
14  
15 7 *house all day doing nothing.'* His intermittent attendance was due to a work-related course  
16  
17 8 and a short period of employment. Cost was an issue:

18  
19 9  
20  
21  
22 10 Peter: *'It's pretty hard because I have got no wages coming in. I've just got Job Seekers*  
23  
24 11 *Allowance and that doesn't even pay my mortgage, so money is really tight. I did have a little*  
25  
26 12 *insurance but that money has now run out and I really am starting to struggle. It is fairly*  
27  
28 13 *cheap, but saying that, when you haven't got a lot of money coming in then it is a lot of*  
29  
30 14 *money to pay out.'*

31  
32  
33 15  
34  
35 16 Peter stated he would continue to attend until he found employment, when he *'might try and*  
36  
37 17 *come with my partner and play badminton once or twice a week.'* His enthusiasm for this  
38  
39 18 appeared to be lacking and therefore long-term change in PA was unlikely.

#### 20 **Defeat: inappropriate referral or poor participation experience**

21  
22 22 The third theme was *defeat*. Within this, subthemes of poor health, social anxiety and poor  
23  
24 23 participation experience were apparent. Some participants never attended an exercise session,  
25  
26 24 being medically excluded (Paul), prevented by ill health (Dan) or social anxieties (despite  
27  
28 25 telephone support):

1

2 Jackie: *'The thought of coming here on my own, with nobody else, I like staying in my*  
3 *comfort zone ... '(staff) phoned; she says about the sessions and that... and I was being*  
4 *honest with her... so she left it a couple of weeks and then phoned back and she says... would*  
5 *you not like to come along by yourself? And I went no'*

6

7 For others, poor participation experience (Dorothy) indicated weaknesses in scheme delivery.  
8 This group were defeated by the barriers faced, they felt ostracised from participation. There  
9 was a sense of failure and, for some, shame. For these participants the ERS did not work.

10

11 Illustrating this theme is Dorothy, who had been previously referred to the scheme on two  
12 occasions. The first time she completed the scheme but did not continue via signposted exit  
13 route activities because her friend stopped attending. On the second occasion, she dropped  
14 out due to a foot problem. She did not like PA:

15

16 Dorothy: *'At school I wasn't very good at PE. I never liked it very much, only did what I had*  
17 *to do. [...] I've been to be the scheme twice before; other than that I don't think I really did*  
18 *any exercise. [...] I've got a real problem with my back. I'm sort of hoping that if I do exercise*  
19 *it will strengthen the muscles in my back and I will be able to do more things.'*

20

21 During her second interview, Dorothy described how she felt unable to cope with the sessions  
22 due to back pain:

23

24 Dorothy: *'I did tell her that I'd got a back problem and I was waiting for these injections, but*  
25 *she said 'well start'. [...] I was quite disappointed because I couldn't do much of what they*

1  
2  
3 1 *was asking us to do. It was a class and it was where you do sort of aerobics first and then go*  
4  
5 2 *to all these sort of stations. I found it really hard.'*

6  
7 3  
8  
9 4 Discussing one session, she described a lack of staff support: *'She just said do what you can*  
10  
11 5 *do and if you can't do whatever it is, just keep your feet moving.'* This contrasted with her  
12  
13 6 experience with another staff member: *'She knew when you couldn't do it and she would give*  
14  
15 7 *you an alternative. So she was really good but she was only there once.'*

16  
17  
18 8  
19  
20 9 The scheme had a system of telephone support, but in Dorothy's case, implementation  
21  
22 10 appeared to be lacking:

23  
24  
25 11  
26  
27 12 Dorothy: *'I phoned in several times to explain. I left messages but nobody got back to me. I*  
28  
29 13 *think if maybe someone had phoned me back and said 'well come in and you can do the*  
30  
31 14 *things a different way' it might have encouraged me to go back in again.'*

32  
33  
34  
35 16 Dorothy raised delivery issues and highlighted the need for a better understanding of protocol  
36  
37 17 implementation by staff. She was very upset by her experience, stating *'It makes you feel like*  
38  
39 18 *a failure sometimes. I don't think I could go to the doctors and say 'I failed last time can you*  
40  
41 19 *refer me again'?' Her experience was complex however. She felt unable to access the peer*  
42  
43 20 support described by those who engaged successfully. During her first interview, Dorothy  
44  
45 21 described how she found socialising difficult: *'I'm not really a good mixer so I find it quite*  
46  
47 22 *hard.'* During her second interview, she reported that the group felt unwelcoming: *'She was*  
48  
49 23 *really nice, one lady that was there. Apart from her, I don't think any of the others were*  
50  
51 24 *welcoming or said anything. Like I said they got into their little twos or threes or whatever.'*

52  
53  
54  
55 25

1  
2  
3 1 Lack of social confidence contributed to dropout, although in Dorothy's case it does not  
4  
5 2 appear to be have been the primary influence. Defeat illustrates how some participants may  
6  
7 3 struggle to access the peer support identified by others as an important facilitator for  
8  
9 4 adherence.  
10

## 11 5 12 13 6 **DISCUSSION**

14  
15  
16 7  
17  
18 8 The purpose of this study was to understand experiences of an ERS to give insight regarding  
19  
20 9 what worked, or did not work, to encourage engagement, and for whom. This is important  
21  
22 10 because existing literature questions ERS effectiveness,<sup>20 22</sup> without exploring adequately  
23  
24 11 how to focus implementation to better personalise support. Three overarching themes  
25  
26 12 emerged. First, *success*, with engaged participants focused on health outcomes. Second,  
27  
28 13 *struggle*, short-term success but with concerns regarding continued engagement. Finally,  
29  
30 14 *defeat*, where illness, social anxiety, and/or poor participation experience prevented  
31  
32 15 engagement. Within the identified themes, similarities in factors affecting engagement and  
33  
34 16 non-engagement were evident. For those who experienced some measure of success, there  
35  
36 17 were shared enablers such as peer support, achievable and enjoyable activities, staff  
37  
38 18 knowledge and staff/peer support. These are reflected to some extent in systematic review  
39  
40 19 findings of engagement facilitators for ERS.<sup>31</sup> What this paper adds is insight regarding  
41  
42 20 whom these facilitators worked best for within the ERS context. Specifically, participants  
43  
44 21 who were able to access social support, had positive previous experiences of PA, and were  
45  
46 22 motivated by improving or maintaining their health. Participants often described success in  
47  
48 23 terms of improvements in mental health and self-esteem, perceptions about ability to be  
49  
50 24 active, and the social benefits of participation. Social and psychological benefits were  
51  
52 25 perceived to be as meaningful as measurable physical health benefits, similar to other  
53  
54  
55  
56  
57  
58  
59  
60

1 reported findings.<sup>32</sup> Success illustrated the value of exercise referral for some participants  
2 with non-communicable diseases. This was not universal however. The study highlighted  
3 unequal abilities to access the scheme, along with differing support requirements, which  
4 suggests the need to provide more tailored support for some. The issues identified are  
5 reflective of other studies examining barriers to PA irrespective of the presence of a medical  
6 condition.<sup>7 11</sup>

7  
8 Adults with complex lives embarked on the ERS with expectations of positive changes in  
9 health. While ERS delivery training courses include elements of behaviour change, the  
10 training does not appear to be sufficient preparation for staff to deal with identified complex  
11 psychological barriers. Indeed the high levels of responsibilities that fitness professionals  
12 undertake has led to concerns about adequacy of education and training.<sup>33</sup> Further  
13 development of behaviour change elements within national occupational standards for  
14 promoting PA could partially address matters. This represents only part of the problem  
15 however. This study illustrates how a 'one size fits all' model does not adequately cater for  
16 the complex range of referrals received. Indeed, the existing model of universal referral to a  
17 common programme is potentially setting such schemes up to fail. This is because current  
18 measures of success are typically quantified as uptake and adherence,<sup>34-36</sup> and/or self-reported  
19 changes in PA.<sup>15 37</sup> Regardless of suitability, providers may feel obliged to 'shoehorn'  
20 referrals into schemes if the continuation of funding is reliant on achievement of such key  
21 performance indicators. This type of approach fails to consider the complex health and social  
22 circumstances of ERS participants, leading to an inadequate focus on what works, and for  
23 whom.

24

1  
2  
3 1 In the case of ERS, there is a need to understand what different approaches are required to  
4  
5 2 support change for those experiencing struggle or defeat. The themes presented in this study  
6  
7 3 may resonate with ERS commissioners and providers and should encourage reflection of  
8  
9 4 approaches to support. *Success* can reinforce good practice, while highlighting potential  
10  
11 5 improvements. *Struggle* can initiate conversations about alternative delivery for those who  
12  
13 6 require more or different support in order to make sustained behaviour change. This may  
14  
15 7 include mechanisms for cyclical support to reengage those who relapse into inactivity and  
16  
17 8 'weaning' to reduce ERS dependency. Finally, *defeat* can initiate conversations about  
18  
19 9 appropriate referrals, improvements to existing provision and alternative models of care. At a  
20  
21 10 broad level, approaches may include support from multiple agencies,<sup>38</sup> the use of  
22  
23 11 technology,<sup>39</sup> or broader system change.<sup>40</sup> Promisingly, there is emerging evidence of  
24  
25 12 practice with the potential to better support patients with struggle or defeat-style narratives.  
26  
27 13 Those with poor health may benefit from individualisation of exercise,<sup>41</sup> those with social  
28  
29 14 anxiety from more online delivery and support,<sup>42</sup> and the complex needs of patients are more  
30  
31 15 likely to be catered for appropriately with increasing use of scheme co-production.<sup>43</sup> Calls at  
32  
33 16 national policy level for better use of triage or a 'stepped approach to delivery'<sup>21</sup> may further  
34  
35 17 assist with both enhancing support for those with challenging circumstances and modifying  
36  
37 18 or reducing it for those that risk becoming scheme dependent. Testing the effectiveness of  
38  
39 19 these ideas should be a priority for future research.  
40  
41  
42  
43  
44  
45

## 21 **Methodological considerations**

22  
23  
24 24 Qualitative analysis is inherently subjective since it is influenced by the assumptions, beliefs  
25  
26 25 and biases of the researcher.<sup>44</sup> In this case, the researcher was experienced in the management  
27  
28  
29  
30  
31  
32  
33  
34  
35  
36  
37  
38  
39  
40  
41  
42  
43  
44  
45  
46  
47  
48  
49  
50  
51  
52  
53  
54  
55  
56  
57  
58  
59  
60

1 and delivery of the ERS studied. Potential biases were explored by the use of reflective field  
2 notes and in group discussions with all authors. Particular attention was paid to how existing  
3 knowledge may have affected discussion with participants and interpretation of results. That  
4 said, while in the past an outsider, objective stance was considered desirable in research terms  
5 to guard against identification, insider insight can now be considered legitimate and desirable  
6 due to the potential for increased empathy with participants.<sup>45</sup> After reflection, it was felt that  
7 researcher knowledge contributed positively to the interpretation of data through being able  
8 to understand the particular scheme that participants were discussing.

9  
10 For each participant, interviews took place on two occasions. Qualitative interviews are only  
11 able to uncover what participants recall or are willing to reveal about their experiences at a  
12 particular time, rather than realities. As such they may reflect recall bias or inaccuracies.  
13 Participant knowledge of the researcher background may also have influenced what was  
14 disclosed. Readers can make choices about whether the identified themes resonate with their  
15 own intuitive understanding of such situations, which arguably can improve practice through  
16 the process of naturalistic generalization.<sup>46</sup>

17  
18 It is not known whether the experiences of those who declined to participate or dropped out  
19 of the study were different to those who took part. For example, we previously established  
20 that those under 55 years of age were less likely to engage in the first instance and more  
21 likely to dropout when they did.<sup>24</sup> However, only one participant from this demographic  
22 completed a second interview. Additionally, this piece of work did not examine barriers to  
23 scheme access for who did not attend the initial consultation. Understanding this group,  
24 however, is critical for determining who current services are failing and why.

25



## 1 **CONCLUSION**

2  
3  
4  
5  
6  
7 Overall, the data support arguments that ERSs can disproportionately engage with, and  
8 benefit, some disadvantaged groups. Importantly they can successfully engage those with  
9 non-communicable diseases, and positively affect health and wellbeing. The value of current  
10 ERSs appears to be for those with social confidence and previous positive experiences of PA.  
11 Conversely, such schemes may fail those who struggle to access social support due to varying  
12 health condition demands, or complex or impaired social circumstances. For those who are  
13 unable to adhere, feelings of ostracism and failure may further exacerbate outcome  
14 differentials. Ultimately, even programmes that target disadvantaged sub-groups (in the case  
15 of ERSs, those with non-communicable diseases) appear at risk of reinforcing inequalities.  
16 This study therefore highlights a need for services and systems that better provide for those  
17 with dynamic health and social circumstances.  
18  
19  
20  
21  
22  
23  
24  
25  
26  
27  
28  
29  
30  
31  
32

33 **Acknowledgements:** Many thanks to ERS staff at Blyth Valley Arts and Leisure for helping  
34 with recruitment and organisation of interviews.  
35  
36  
37  
38  
39

40 **Author Contributions:** CLH contributed to the study design, data collection, data analysis  
41 and preparation of the final document. EO contributed to data analysis and preparation of the  
42 final document. CDR contributed to study design, data analysis and preparation of the final  
43 document. LJA contributed to study design, data analysis and preparation of the final  
44 document. All authors contributed to this paper and approved the final version.  
45  
46  
47  
48  
49  
50  
51  
52

53 **Funding:** Blyth Valley Arts and Leisure was one of two providers of the exercise referral  
54 scheme studied and provided funding for a PhD to evaluate the service.  
55  
56  
57  
58  
59  
60

1

2  
3  
4  
5 2 **Competing interests:** CLH is a former employee of Blyth Valley Arts and Leisure and  
6  
7 3 completed a PhD that was funded by the aforementioned company.  
8

9

10  
11 5 **Participant consent:** obtained  
12  
13 6

14  
15  
16 7 **Ethics approval:** Northumbria University Faculty of Health and Life Sciences Ethics  
17  
18 8 Committee (Ref: 15-03-131781)  
19

20

21  
22 10 **Provenance and peer review:** Not commissioned; externally peer reviewed.  
23  
24 11

25  
26 12 **Data sharing statement:** No additional data are available.  
27  
28 13

## 29 14 **REFERENCES**

- 30  
31  
32  
33 15  
34  
35 16 1. Lee IM, Shiroma EJ, Lobelo F, et al. Effect of physical inactivity on major non-  
36  
37 17 communicable diseases worldwide: an analysis of burden of disease and life expectancy.  
38  
39 18 *Lancet* 2012;380:219-29. doi: 10.1016/S0140-6736(12)61031-9  
40  
41  
42 19 2. Ding D, Lawson KD, Kolbe-Alexander TL, et al. The economic burden of physical  
43  
44 20 inactivity: a global analysis of major non-communicable diseases. *Lancet* 2016;388:1311-24.  
45  
46 21 doi: 10.1016/S0140-6736(16)30383-X  
47  
48  
49 22 3. World Health Organisation. *Global action plan for the prevention and control of non-*  
50  
51 23 *communicable diseases 2013-2020*. Geneva: World Health Organisation, 2013.  
52  
53 24 [http://africahealthforum.afro.who.int/IMG/pdf/global\\_action\\_plan\\_for\\_the\\_prevention\\_and\\_c](http://africahealthforum.afro.who.int/IMG/pdf/global_action_plan_for_the_prevention_and_c)  
54  
55 25 [ontrol\\_of\\_ncds\\_2013-2020.pdf](http://africahealthforum.afro.who.int/IMG/pdf/global_action_plan_for_the_prevention_and_c): (Accessed: 05 March 2018)  
56  
57  
58  
59

- 1 4. World Health Organisation. *Global status report on noncommunicable diseases, 2014*.  
2 Geneva: World Health Organisation, 2014.  
3 [http://apps.who.int/iris/bitstream/10665/148114/1/9789241564854\\_eng.pdf](http://apps.who.int/iris/bitstream/10665/148114/1/9789241564854_eng.pdf) (Accessed: 05  
4 March 2018).
- 5 5. Eime RM, Charity MJ, Harvey JT, et al. Participation in sport and physical activity:  
6 associations with socio-economic status and geographical remoteness. *BMC Public Health*  
7 2015;15:434. doi: 10.1186/s12889-015-1796-0
- 8 6. Sievi NA, Senn O, Brack T, et al. Impact of comorbidities on physical activity in COPD.  
9 *Respirology* 2015;20(3):413-18. doi: 10.1111/resp.12456
- 10 7. Picorelli AMA, Pereira LSM, Pereira DS, et al. Adherence to exercise programs for older  
11 people is influenced by program characteristics and personal factors: a systematic review.  
12 *Journal of Physiotherapy* 2014;60(3):151-56. doi: 10.1037/0022-006X.51.3.390
- 13 8. Allender S, Cowburn G, Foster C. Understanding participation in sport and physical  
14 activity among children and adults: a review of qualitative studies. *Health Educ Res*  
15 2006;21(6):826-35. doi: 10.1093/her/cyl063
- 16 9. Borodulin K, Sipila N, Rahkonen O, et al. Socio-demographic and behavioral variation in  
17 barriers to leisure-time physical activity. *Scand J Public Health* 2016;44(1):62-69. doi:  
18 10.1177/1403494815604080
- 19 10. Kern ML, Reynolds CA, Friedman HS. Predictors of Physical Activity Patterns Across  
20 Adulthood: A Growth Curve Analysis. *Pers Soc Psychol Bulletin* 2010. doi:  
21 10.1177/0146167210374834

- 1  
2  
3 1 11. Pan S, Cameron C, DesMeules M, et al. Individual, social, environmental, and physical  
4  
5 2 environmental correlates with physical activity among Canadians: a cross-sectional study.  
6  
7 3 *BMC Public Health* 2009;9(1):21. doi: 10.1186/1471-2458-9-21  
8  
9  
10 4 12. Zunft H-JF, Friebe D, Seppelt B, et al. Perceived benefits and barriers to physical activity  
11  
12 5 in a nationally representative sample in the European Union. *Public Health Nutr*  
13  
14 6 1999;2(Supplement 1a):153-60. doi: 10.1017/S1368980099000208  
15  
16  
17 7 13. Sowden S, Raine R. Running along parallel lines: how political reality impedes the  
18  
19 8 evaluation of public health interventions. A case study of exercise referral schemes in  
20  
21 9 England. *J Epidemiol Community Health* 2008;62(9):835 - 41. doi:10.1136/jech.2007.069781  
22  
23  
24 10 14. Murphy SM, Edwards RT, Williams N, et al. An evaluation of the effectiveness and cost  
25  
26 11 effectiveness of the National Exercise Referral Scheme in Wales, UK: a randomised  
27  
28 12 controlled trial of a public health policy initiative. *J Epidemiol Community Health*  
29  
30 13 2012;66(8):745-53. doi: 10.1136/jech-2011-200689  
31  
32  
33 14 15. Sorenson J, Kragstrup J, Stovgaard T, et al. Exercise on Prescription: a randomized study  
34  
35 15 on the effect of counseling vs counseling and supervised exercise. *Scand J Med Sci Sports*  
36  
37 16 2008;18(3). doi: 10.1111/j.1600-0838.2008.00811.x  
38  
39  
40 17 16. Gusi N, Reyes M, Gonzalez-Guerrero J, et al. Cost-utility of a walking programme for  
41  
42 18 moderately depressed, obese, or overweight elderly women in primary care: a randomised  
43  
44 19 controlled trial. *BMC Public Health* 2008;8(1):231. doi: 10.1186/1471-2458-8-231  
45  
46  
47 20 17. Gallegos-Carrillo K, García-Peña C, Salmerón J, et al. Brief Counseling and Exercise  
48  
49 21 Referral Scheme: A Pragmatic Trial in Mexico. *Am J Prev Med* 2017;52(2):249-59.  
50  
51 22 doi:10.1016/j.amepre.2016.10.021  
52  
53  
54  
55  
56  
57  
58  
59  
60

- 1  
2  
3 1 18. Public Health England. *Identifying what works for local physical inactivity interventions*.  
4  
5 2 London, Public Health England, 2014.  
6  
7 3 [https://www.gov.uk/government/uploads/system/uploads/attachment\\_data/file/374560/What](https://www.gov.uk/government/uploads/system/uploads/attachment_data/file/374560/What)  
8  
9 4 [worksv1\\_2.pdf](https://www.gov.uk/government/uploads/system/uploads/attachment_data/file/374560/What): (Accessed: 05 March 2018)  
10  
11  
12 5 19. Oliver EJ, Hanson CL, Lindsey IA, et al. Exercise on referral: evidence and complexity at  
13  
14 6 the nexus of public health and sport policy. *International Journal of Sport Policy and Politics*  
15  
16 7 2016;1-6. doi: 10.1186/1471-2458-9-21  
17  
18  
19 8 20. Campbell F, Holmes M, Everson-Hock E, et al. A systematic review and economic  
20  
21 9 evaluation of exercise referral schemes in primary care: a short report. *Health Technol Assess*  
22  
23 10 2015;19(60):1-87. doi: 10.3310/hta19600  
24  
25  
26 11 21. National Institute for Health and Care Excellence. *Physical activity; exercise referral*  
27  
28 12 *schemes*. National Institute for Health and Care Excellence, 2014.  
29  
30 13 <https://www.nice.org.uk/guidance/ph54/resources/physical-activity-exercise-referral->  
31  
32 14 [schemes-pdf-1996418406085](https://www.nice.org.uk/guidance/ph54/resources/physical-activity-exercise-referral-) (Accessed: 05 March 2018).  
33  
34  
35 15 22. Pavey TG, Taylor A, Fox K, et al. Effect of exercise referral schemes in primary care on  
36  
37 16 physical activity and improving health outcomes: systematic review and meta-analysis. *BMJ*  
38  
39 17 2011;343. doi: 10.1136/bmj.d6462  
40  
41  
42 18 23. Tong A, Sainsbury P, Craig J. Consolidated criteria for reporting qualitative research  
43  
44 19 (COREQ): a 32-item checklist for interviews and focus groups. *Int J Qual Health Care*  
45  
46 20 2007;19(6):349-57. doi: 10.1093/intqhc/mzm042  
47  
48  
49 21 24. Hanson CL, Allin LJ, Ellis JG, et al. An evaluation of the efficacy of the exercise on  
50  
51 22 referral scheme in Northumberland, UK: association with physical activity and predictors of  
52  
53 23 engagement. A naturalistic observation study. *BMJ Open* 2013;3(8). doi: 10.1136/bmjopen-  
54  
55 24 2013-002849  
56  
57  
58  
59  
60

- 1  
2  
3 1 25. Prochaska JO, Marcus BH. *The transtheoretical model: Applications to exercise*. In:  
4  
5 2 Dishman RK, ed. *Advances in exercise adherence*. Champaign, IL, England: Human Kinetics  
6  
7 3 1994:161-80.  
8  
9  
10 4 26. Prochaska JO, DiClemente CC. Stages and processes of self-change of smoking: Toward  
11  
12 5 an integrative model of change. *J Consult and Clin Psychol* 1983;Vol 51(3):390-95. doi:  
13  
14 6 10.1037/0022-006X.51.3.390  
15  
16  
17 7 27. Marshall MN. Sampling for qualitative research. *Fam Pract* 1996;13(6):522-26.  
18  
19 8 doi:10.1093/fampra/13.6.522  
20  
21  
22 9 28. Strauss AL. *Qualitative analysis for social scientists*. Cambridge: Cambridge University  
23  
24 10 Press, 1987.  
25  
26  
27 11 29. Spencer L, Ritchie J, Lewis J, et al. *Quality in qualitative evaluation: a framework for*  
28  
29 12 *assessing research evidence*. National Centre for Social Research, 2003.  
30  
31 13 <http://dera.ioe.ac.uk/21069/2/a-quality-framework-tcm6-38740.pdf> (Accessed: 05 March  
32  
33 14 2018).  
34  
35  
36 15 30. Festinger L. A Theory of Social Comparison Processes. *Human Relations* 1954;7(2):117-  
37  
38 16 40. doi: 10.1177/001872675400700202  
39  
40  
41 17 31. Morgan F, Battersby A, Weightman AL, et al. Adherence to exercise referral schemes by  
42  
43 18 participants – what do providers and commissioners need to know? A systematic review of  
44  
45 19 barriers and facilitators. *BMC Public Health* 2016;16(1):1-11 doi: 10.1186/s12889-016-2882-  
46  
47 20 7  
48  
49  
50 21 32. Pentecost C, Taket A. Understanding exercise uptake and adherence for people with  
51  
52 22 chronic conditions: a new model demonstrating the importance of exercise identity, benefits  
53  
54 23 of attending and support. *Health Educ Res* 2011;26(5):908-22. doi: 10.1093/her/cyr052  
55  
56  
57  
58  
59  
60

- 1  
2  
3 1 33. De Lyon ATC, Neville RD, Armour KM. The Role of Fitness Professionals in Public  
4  
5 2 Health: A Review of the Literature. *Quest* 2017;69(3):313-30. doi:  
6  
7 3 10.1080/00336297.2016.1224193  
8  
9  
10 4 34. Dugdill L, Graham R, McNair F. Exercise referral: the public health panacea for physical  
11  
12 5 activity promotion? A critical perspective of exercise referral schemes; their development and  
13  
14 6 evaluation. *Ergonomics* 2005;48:1390-410. doi: 10.1080/00140130500101544  
15  
16  
17 7 35. Gidlow C, Johnston LH, Crone D, et al. Socio-demographic patterning of referral, uptake  
18  
19 8 and attendance in Physical Activity Referral Schemes. *J Public Health* 2007;29(2):107-13.  
20  
21 9 doi:10.1093/pubmed/fdm002  
22  
23  
24 10 36. Sowden S, Breeze E, Barber J, et al. Do general practices provide equitable access to  
25  
26 11 physical activity interventions? *Br J Gen Pract* 2008;58:e1-e8. doi: 10.3399/bjgp08X342237  
27  
28  
29 12 37. Duda JL, Williams GC, Ntoumanis N, et al. Effects of a standard provision versus an  
30  
31 13 autonomy supportive exercise referral programme on physical activity, quality of life and  
32  
33 14 well-being indicators: a cluster randomised controlled trial. *Int J Behav Nutr Phys Act*  
34  
35 15 2014;11(1):1-15. doi: 10.1186/1479-5868-11-10  
36  
37  
38 16 38. Sugai G, Horner RH, Dunlap G, et al. Applying positive behavior support and functional  
39  
40 17 behavioral assessment in schools. *J Posit Behav Interv* 2000;2(3):131-43. doi:  
41  
42 18 10.1177/109830070000200302  
43  
44  
45 19 39. Gallagher R, Gallagher P, Zhang L, et al. Technology Use and Confidence in Cardiac  
46  
47 20 Rehabilitation Patients. *Heart Lung Circ* 2016;25:S333. doi: 10.1016/j.hlc.2016.06.791  
48  
49  
50 21 40. Michie S, van Stralen MM, West R. The behaviour change wheel: A new method for  
51  
52 22 characterising and designing behaviour change interventions. *Implement Sci* 2011;6(1):42.  
53  
54 23 doi: 10.1186/1748-5908-6-42  
55  
56  
57  
58  
59  
60

- 1  
2  
3 1 41. Martín-Borràs C, Giné-Garriga M, Puig-Ribera A, Martín C, Solà M, Cuesta-Vargas AI.  
4  
5 2 A new model of exercise referral scheme in primary care: is the effect on adherence to  
6  
7 3 physical activity sustainable in the long term? A 15-month randomised controlled trial. *BMJ*  
8  
9 4 *open*. 2018;8(3):e017211.  
10  
11  
12 5 42. Hawkins J, Madden K, Fletcher A, Midgley L, Grant A, Cox G, et al. Development of a  
13  
14 6 framework for the co-production and prototyping of public health interventions. *BMC Public*  
15  
16 7 *Health*. 2017;17:689.  
17  
18  
19 8 43. Buckley B, Thijssen D, Murphy R, Graves L, Whyte G, Gillison F, et al. Making a move  
20  
21 9 in exercise referral: co-development of a physical activity referral scheme. *Journal of Public*  
22  
23 10 *Health*. 2018. doi: 0.1093/pubmed/fdy072  
24  
25  
26 11 44. Creswell JW, Miller DL. Determining validity in qualitative inquiry. *Theory into practice*  
27  
28 12 2000;39(3):124-30. doi: 10.1207/s15430421tip3903  
29  
30  
31 13 45. Gair S. Feeling Their Stories: Contemplating Empathy, Insider/Outsider Positionings, and  
32  
33 14 Enriching Qualitative Research. *Qual Health Res* 2012;22(1):134-43. doi:  
34  
35 15 10.1177/1049732311420580  
36  
37  
38 16 46. Stake RE, Trumbull DJ. Naturalistic generalizations. *Review Journal of Philosophy and*  
39  
40 17 *Social Science* 1982;7(1):1-12.  
41  
42  
43  
44  
45  
46  
47  
48  
49  
50  
51  
52  
53  
54  
55  
56  
57  
58  
59  
60



**Referral by healthcare professional**  
(Standardised referral form)

**Personal contact from ERS**

(Telephone call or postal contact to arrange initial one to one consultation)

**Initial consultation**

(All consultations based on Transtheoretical Model)

Assessment of stage of change, assessment of self-reported physical activity and discussion about physical activity levels / opportunities to exercise via the scheme (behaviour change techniques such as decisional balance incorporated as required)

Not ready to change or medically excluded

**Brief physical activity advice** notification to referrer of non-participation

Ready to change

**Supervised ERS group physical activity sessions**

12 weeks, 2 sessions per week

Options include gym usage, circuit classes, racquet sports and aqua aerobics

**Individual non-ERS supervised physical activity options**

Swimming, casual gym or fitness class attendance

Non-attenders return encouraged via telephone (3 attempts) / postal contact (if unable to contact by telephone)

**12-week consultation**

Assessment of stage of change, discussion about physical activity levels / opportunities to exercise via the scheme (behaviour change techniques incorporated as required)

**Supervised ERS group physical activity sessions**

12 weeks, 2 sessions per week

Options include gym usage, circuit classes, racquet sports and aqua aerobics

**Individual non-ERS supervised physical activity options**

Swimming, casual gym or fitness class attendance

Non-attenders return encouraged via telephone (3 attempts) / postal contact (if unable to contact by telephone)

**24-week consultation**

Assessment of stage of change, assessment of self-reported physical activity and discussion about physical activity levels / opportunities to exercise after completion of the scheme (behaviour change techniques incorporated as required)

Feedback to referrer

**Exit routes** (similar ERS supervised exit sessions, reduced cost fitness and/or swimming memberships) or **independent activity**

1  
2  
3  
4  
5  
6  
7  
8  
9  
10  
11  
12  
13  
14  
15  
16  
17  
18  
19  
20  
21  
22  
23  
24  
25  
26  
27  
28  
29  
30  
31  
32  
33  
34  
35  
36  
37  
38  
39  
40  
41  
42  
43  
44  
45  
46  
47  
48  
49  
50  
51  
52  
53  
54  
55  
56  
57  
58  
59  
60

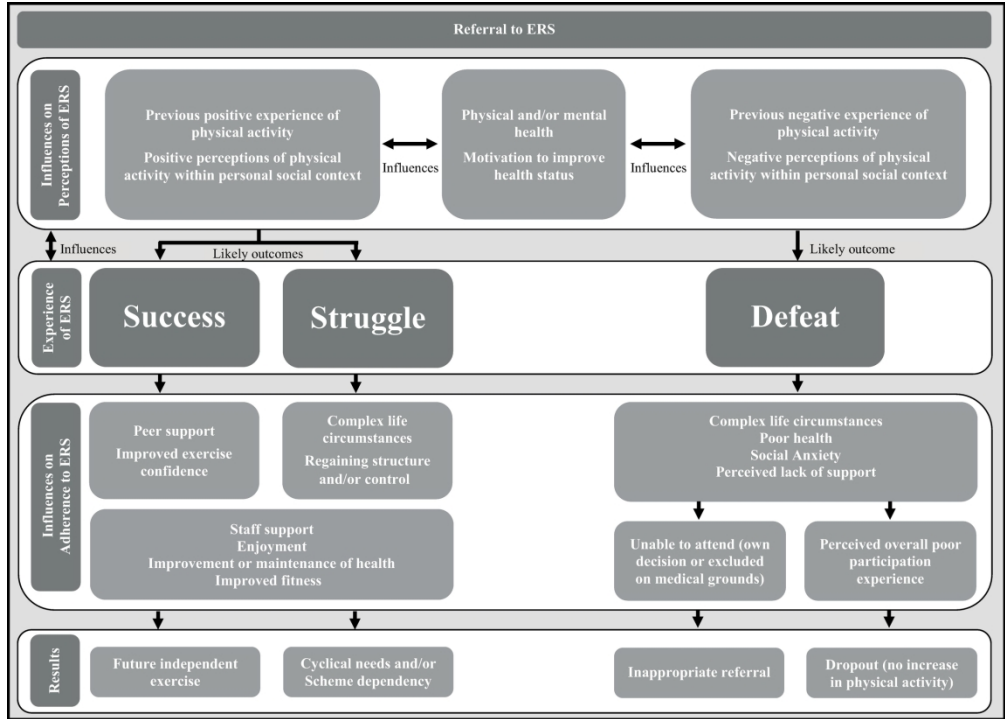

Figure 2: Thematic analysis of ERS experiences

206x148mm (300 x 300 DPI)

### Expectations of participants in the Northumberland exercise on referral scheme.

**Preface:** Set the interviewee at rest; explain the purpose of the interview (to understand their expectations of the exercise on referral scheme) explain that the expected outcomes (that the study will give a better understanding of why the scheme works for some people, but not others); rules of confidentiality etc.

Record demographic / personal info to start:

- Gender
- Age
- Employment status

| Question                                                                                                                          | Prompts                                                                                                                                                                                                                                                                                                                                                                                                                                                                                                                                                                           |
|-----------------------------------------------------------------------------------------------------------------------------------|-----------------------------------------------------------------------------------------------------------------------------------------------------------------------------------------------------------------------------------------------------------------------------------------------------------------------------------------------------------------------------------------------------------------------------------------------------------------------------------------------------------------------------------------------------------------------------------|
| <p><b>1. Tell me a bit about what sort of physical activity you have taken part in in the past.</b></p>                           | <ul style="list-style-type: none"> <li>• <i>What were your experiences of sport /physical activity at school / as a child</i></li> <li>• <i>What influence have others had on the type of physical activity you have taken part in?</i></li> <li>• <i>Do you have any particular likes / dislikes of sport / physical activity?</i></li> <li>• <i>Tell me about any times in past where there has been a big change in your physical activity patterns</i></li> <li>• <i>Has there been anything else that has influenced your participation in physical activity?</i></li> </ul> |
| <p><b>2. How do you feel about taking part in physical activity now?</b></p>                                                      | <ul style="list-style-type: none"> <li>• <i>What type of physical activity (if any) do they take part in at the moment?</i></li> <li>• <i>What type of physical activity would they like to take part in?</i></li> <li>• <i>What do they think the important reasons for taking part in physical activity are?</i></li> <li>• <i>Is there anything that particularly worries them about taking part in physical activity?</i></li> </ul>                                                                                                                                          |
| <p><b>3. So thinking about the exercise on referral scheme that you have been referred to, how did you find out about it?</b></p> | <ul style="list-style-type: none"> <li>• <i>Who/ what has motivated you to attend?</i></li> <li>• <i>What made you decide that this is the right time to take part in the scheme?</i></li> </ul>                                                                                                                                                                                                                                                                                                                                                                                  |
| <p><b>4. Why were you referred to the scheme?</b></p>                                                                             | <ul style="list-style-type: none"> <li>• <i>What did the referrer explain to you about the scheme?</i></li> <li>• <i>What do you expect (if anything) when you start attending the scheme?</i></li> </ul>                                                                                                                                                                                                                                                                                                                                                                         |

1  
2  
3  
4  
5  
6  
7  
8  
9  
10  
11  
12  
13  
14  
15  
16  
17  
18  
19  
20  
21  
22  
23  
24  
25  
26  
27  
28  
29  
30  
31  
32  
33  
34  
35  
36  
37  
38  
39  
40  
41  
42  
43  
44  
45  
46

|                                                                                                                           |                                                                                                                                                                                                                                                                                                                  |
|---------------------------------------------------------------------------------------------------------------------------|------------------------------------------------------------------------------------------------------------------------------------------------------------------------------------------------------------------------------------------------------------------------------------------------------------------|
|                                                                                                                           | <ul style="list-style-type: none"> <li>• <i>What type of health professional referred you?</i></li> </ul>                                                                                                                                                                                                        |
| <b>5. What do you hope to achieve by taking part in the scheme?</b>                                                       | <ul style="list-style-type: none"> <li>• <i>What are the changes to your health that you expect will happen as a result of participation?</i></li> <li>• <i>How quickly do you expect to see these changes?</i></li> <li>• <i>How have you decided that these changes are realistic?</i></li> </ul>              |
| <b>6. How do you feel about being referred?</b>                                                                           | <ul style="list-style-type: none"> <li>• <i>How confident do you feel about taking part in the scheme?</i></li> <li>• <i>What are you particularly looking forward to?</i></li> <li>• <i>What are you worried about?</i></li> </ul>                                                                              |
| <b>7. What happened after you were referred?</b>                                                                          | <ul style="list-style-type: none"> <li>• <i>How long after referral did it take to be contacted by the scheme?</i></li> <li>• <i>What information has been given to you prior to the initial consultation?</i></li> <li>• <i>How comfortable do you feel coming to first consultation?</i></li> </ul>            |
| <b>8. What are the things do you think will most influence you to attend sessions?</b>                                    | <ul style="list-style-type: none"> <li>• <i>How important do you think attendance in a group will be?</i></li> <li>• <i>What do you expect from the staff on the scheme?</i></li> <li>• <i>How important are changes in health?</i></li> <li>• <i>Why were the influences raised important?</i></li> </ul>       |
| <b>9. What things do you think are most likely to prevent you from attending sessions?</b>                                | <ul style="list-style-type: none"> <li>• <i>Tell me about any worries you might have about health issues</i></li> <li>• <i>Tell me about any other things such as other commitments that might stop you from attending</i></li> <li>• <i>What ways might you overcome these issues if they arise?</i></li> </ul> |
| <b>10. Is there anything else that you would like to tell me about your expectations for participation in the scheme?</b> |                                                                                                                                                                                                                                                                                                                  |

### Semi Structured Interview Questions:

Welcome interviewee back; explain the purpose of the interview (to hear about their experiences of the exercise on referral scheme) explain that the expected outcomes (that the study will give a better understanding of why the scheme works for some people, but not others); rules of confidentiality etc.

|                                                                                                                                                                                |                                                                                                                                                                                                                                                                                                                                                                                                                                                                                                                                                                                                                                                                                                                                                                                                                                                                                                                                                                                                                                                                     |
|--------------------------------------------------------------------------------------------------------------------------------------------------------------------------------|---------------------------------------------------------------------------------------------------------------------------------------------------------------------------------------------------------------------------------------------------------------------------------------------------------------------------------------------------------------------------------------------------------------------------------------------------------------------------------------------------------------------------------------------------------------------------------------------------------------------------------------------------------------------------------------------------------------------------------------------------------------------------------------------------------------------------------------------------------------------------------------------------------------------------------------------------------------------------------------------------------------------------------------------------------------------|
| <p><b>1. First I would like to talk about the consultation that you had before you started the scheme – what you were asked about and what information you were given.</b></p> | <ul style="list-style-type: none"> <li>• <i>What did the member of staff ask you about?(medical issues related to exercise, past and current exercise, feelings about taking part in the scheme)</i></li> <li>• <i>How did these questions make you feel?</i></li> <li>• <i>What tests were carried out?</i></li> <li>• <i>How did you feel about the different tests that you were asked to do (BP, BMI, resting heart rate and Chester step test)?</i></li> <li>• <i>What information were you given? (scheme information, times of sessions etc, results of tests that were carried out, other information about physical activity options outside the scheme, cost of attendance)</i></li> <li>• <i>Did you agree to attend at the end of the consultation?(if no go on to question 2)</i></li> <li>• <i>How did you feel about attending the scheme exercise sessions at the end of the consultation?</i></li> <li>• <i>Was there anything that you were looking forward to?</i></li> <li>• <i>Was there anything that you were concerned about</i></li> </ul> |
| <p><b>2. Why did you decide that the scheme was not right for you?</b></p>                                                                                                     | <ul style="list-style-type: none"> <li>• <i>How did you feel about being referred at the end of the consultation?</i></li> <li>• <i>Did the consultation encourage you to take part in physical activity even though you did not attend any sessions? If so, in what way?</i></li> <li>• <i>Have you been back to see the person who referred you to discuss your referral? If so, what did you discuss?</i></li> <li>• <i>What could the scheme have offered you that would have encouraged you to attend?</i></li> <li>• <i>Have you changed your levels of physical activity since you were referred? If yes, did the fact that you were referred influence this and in what way</i></li> </ul>                                                                                                                                                                                                                                                                                                                                                                  |
| <p><b>How many scheme exercise sessions have you attended?</b></p>                                                                                                             |                                                                                                                                                                                                                                                                                                                                                                                                                                                                                                                                                                                                                                                                                                                                                                                                                                                                                                                                                                                                                                                                     |

|                                                                                                                         |                                                                                                                                                                                                                                                                                                                                                                                                                                                                                                                                                                                                                                                                                                                                               |
|-------------------------------------------------------------------------------------------------------------------------|-----------------------------------------------------------------------------------------------------------------------------------------------------------------------------------------------------------------------------------------------------------------------------------------------------------------------------------------------------------------------------------------------------------------------------------------------------------------------------------------------------------------------------------------------------------------------------------------------------------------------------------------------------------------------------------------------------------------------------------------------|
| <p><b>3. Thinking about how first exercise session, how did you feel about the scheme before you attended this?</b></p> | <ul style="list-style-type: none"> <li>• <i>How comfortable did you feel about coming into the centre to take part in an actual exercise session?</i></li> <li>• <i>What happened during the first session?</i></li> <li>• <i>What activities did you take part in?</i></li> <li>• <i>How did you feel about the activities?</i></li> <li>• <i>How did you find the other members of the group?</i></li> <li>• <i>How did you feel after the first session?</i></li> </ul>                                                                                                                                                                                                                                                                    |
| <p><b>4. Are you still attending the scheme sessions? (if no, go to question 6)</b></p>                                 | <ul style="list-style-type: none"> <li>• <i>What are the things that you enjoy about attending the scheme?</i></li> <li>• <i>How have you found the staff?</i></li> <li>• <i>Have there been any weeks where you have not attended at all?</i></li> <li>• <i>If yes, did anyone from the scheme contact you?</i></li> <li>• <i>If yes, who, how and did it have any effect?</i></li> <li>• <i>Do you have any suggestions for what the scheme might do differently?(go to Q7)</i></li> </ul>                                                                                                                                                                                                                                                  |
| <p><b>5. When did you stop attending?</b></p>                                                                           | <ul style="list-style-type: none"> <li>• <i>Why did you stop attending?</i></li> <li>• <i>Did anyone from the scheme contact you when you did not attend?</i></li> <li>• <i>What happened?</i></li> <li>• <i>How did you find the staff?</i></li> <li>• <i>How did you find the sessions that you did attend?</i></li> <li>• <i>What, if any, parts of the scheme did you enjoy?</i></li> <li>• <i>Do you have any suggestions for what the scheme might do differently?</i></li> <li>• <i>Compared to before you were referred to the scheme, have you changed the amount of physical activity that you do?</i></li> <li>• <i>If yes, what do you do that is different?</i></li> <li>• <i>What made you change your activity?</i></li> </ul> |

|                                                                                                                                             |                                                                                                                                                                                                                                                                                                                                                                                                                                                                                   |
|---------------------------------------------------------------------------------------------------------------------------------------------|-----------------------------------------------------------------------------------------------------------------------------------------------------------------------------------------------------------------------------------------------------------------------------------------------------------------------------------------------------------------------------------------------------------------------------------------------------------------------------------|
|                                                                                                                                             | <ul style="list-style-type: none"> <li>• <i>How important do you think that physical activity is in helping to maintain or improve your health? Has this view changed since you were referred?</i></li> </ul>                                                                                                                                                                                                                                                                     |
| <p><b>6. At the first interview, you told me that you hoped to achieve.... Now you have taken part in the scheme for 12 weeks:</b></p>      | <ul style="list-style-type: none"> <li>• <i>What changes to your health have you noticed?</i></li> <li>• <i>Were these changes what you expected?</i></li> <li>• <i>Have other factors outside the scheme had an effect on your health / lifestyle choices?</i></li> <li>• <i>How important are these changes in encouraging you to keep attending?</i></li> </ul>                                                                                                                |
| <p><b>7. At the first interview, you told me that you are worried about....Now that you have taken part in the scheme for 12 weeks:</b></p> | <ul style="list-style-type: none"> <li>• <i>Were the concerns that you had justified?</i></li> <li>• <i>How were these concerns addressed when you attended?</i></li> <li>• <i>Is there anything that you can suggest that the scheme might do to help other people who feel the same way about attending as you did?</i></li> </ul>                                                                                                                                              |
| <p><b>8. Have you increased the amount of activity you do overall?</b></p>                                                                  | <ul style="list-style-type: none"> <li>• <i>Have you increased the amount of activity you are doing independently of the scheme sessions?</i></li> <li>• <i>If so, what you are doing that is different from before you started?</i></li> <li>• <i>Why have you changed your activity outside the scheme?</i></li> <li>• <i>How important do you think that physical activity is in maintaining or improving your health? Is this different to before you started?</i></li> </ul> |
| <p><b>9. What are you most looking forward to in the next 12 weeks of the scheme?</b></p>                                                   | <ul style="list-style-type: none"> <li>• <i>Is there anything in particular that you think will encourage you to keep attending?</i></li> <li>• <i>What are you hoping to achieve over the second part of the scheme?</i></li> </ul>                                                                                                                                                                                                                                              |

1  
2  
3  
4  
5  
6  
7  
8  
9  
10  
11  
12  
13  
14  
15  
16  
17  
18  
19  
20  
21  
22  
23  
24  
25  
26  
27  
28  
29  
30  
31  
32  
33  
34  
35  
36  
37  
38  
39  
40  
41  
42  
43  
44  
45  
46

|                                                                                                                                                                                |                                                                                                                                                                                                                                                                                                                                                                   |
|--------------------------------------------------------------------------------------------------------------------------------------------------------------------------------|-------------------------------------------------------------------------------------------------------------------------------------------------------------------------------------------------------------------------------------------------------------------------------------------------------------------------------------------------------------------|
| <p><b>10. What things do you think are most likely to prevent you from attending sessions?</b></p>                                                                             | <ul style="list-style-type: none"> <li>• <i>Tell me about any worries you might have about health issues and scheme attendance</i></li> <li>• <i>Tell me about any other things such as other commitments that might stop you from attending</i></li> <li>• <i>Have you thought about any ways that you might overcome these issues if they arise?</i></li> </ul> |
| <p><b>11. Is there anything else that you would like to tell me about your experience of participation in the scheme and your expectations for the rest of the scheme?</b></p> |                                                                                                                                                                                                                                                                                                                                                                   |

For peer review only



**COREQ GUIDELINES REPORTING CHECKLIST: How do participant experiences and characteristics influence engagement in exercise referral? A qualitative longitudinal study of a scheme in Northumberland, United Kingdom.**

| No                                             | Item                                     | Guide questions/description                                                                                                                      | Information                                                                                                                                                                 | Reported in manuscript (Section, page no)                   |
|------------------------------------------------|------------------------------------------|--------------------------------------------------------------------------------------------------------------------------------------------------|-----------------------------------------------------------------------------------------------------------------------------------------------------------------------------|-------------------------------------------------------------|
| <b>Domain 1: Research team and reflexivity</b> |                                          |                                                                                                                                                  |                                                                                                                                                                             |                                                             |
| Personal Characteristics                       |                                          |                                                                                                                                                  |                                                                                                                                                                             |                                                             |
| 1                                              | Interviewer/facilitator:                 | Which author/s conducted the interview or focus group?                                                                                           | CLH                                                                                                                                                                         | Data collection and analysis, page 9                        |
| 2                                              | Credentials                              | What were the researcher's credentials?                                                                                                          | CLH PhD student and experienced in working in intervention studied. LJA experienced qualitative researcher                                                                  | Data collection and analysis, page 9                        |
| 3                                              | Occupation                               | What was their occupation at the time of the study?                                                                                              | PhD student and strategic manager in the ERS provider organisation                                                                                                          | Data collection and analysis, page 9                        |
| 4                                              | Gender                                   | Was the researcher male or female?                                                                                                               | Female (referred to as her)                                                                                                                                                 | Data collection and analysis, page 9                        |
| 5                                              | Experience and training                  | What experience or training did the researcher have?                                                                                             | CLH: Qualitative research training and support from experienced researcher (LJA)                                                                                            | Data collection and analysis, page 9                        |
| Relationship with participants                 |                                          |                                                                                                                                                  |                                                                                                                                                                             |                                                             |
| 6                                              | Relationship established                 | Was a relationship established prior to study commencement?                                                                                      | No, participants were approached by ERS staff to explain the study and seek consent.                                                                                        | Sample, page 8                                              |
| 7                                              | Participant knowledge of the interviewer | What did the participants know about the researcher? <i>e.g. personal goals, reasons for doing the research</i>                                  | Participants were informed of researcher's employment status and that the research aimed to improved service delivery                                                       | Sample, page 8                                              |
| 8                                              | Interviewer characteristics              | What characteristics were reported about the interviewer/facilitator? <i>e.g. Bias, assumptions, reasons and interests in the research topic</i> | Acknowledgement of potential bias due to insider knowledge. Interest in service improvement and employment status of interviewer disclosed in study invitation information. | Methodological Considerations, page 21-22<br>Sample, page 8 |
| <b>Domain 1: Study design</b>                  |                                          |                                                                                                                                                  |                                                                                                                                                                             |                                                             |
| Theoretical framework                          |                                          |                                                                                                                                                  |                                                                                                                                                                             |                                                             |
| 9                                              | Methodological orientation and Theory    | What methodological orientation was stated to underpin the study? <i>e.g. grounded theory,</i>                                                   | Thematic analysis using the framework approach                                                                                                                              | Data collection and analysis, page 9                        |

|    |                              |                                                                                           |                                                                                                                         |                                                                         |
|----|------------------------------|-------------------------------------------------------------------------------------------|-------------------------------------------------------------------------------------------------------------------------|-------------------------------------------------------------------------|
|    |                              | <i>discourse analysis, ethnography, phenomenology, content analysis</i>                   |                                                                                                                         |                                                                         |
|    | Participant selection        |                                                                                           |                                                                                                                         |                                                                         |
| 10 | Sampling                     | How were participants selected? <i>e.g. purposive, convenience, consecutive, snowball</i> | Initially convenience from a defined group, then purposive                                                              | Sample, page 8                                                          |
| 11 | Method of approach           | How were participants approached? <i>e.g. face-to-face, telephone, mail, email</i>        | By telephone by scheme provider                                                                                         | Sample, page 8                                                          |
| 12 | Sample size                  | How many participants were in the study?                                                  | 15 initially but only 11 completed both interviews                                                                      | Results, page 10                                                        |
| 13 | Non-participation            | How many people refused to participate or dropped out? Reasons?                           | Of initial invitees 13/25 refused. Of 15 initial participants, 4 dropped out. (no response n=2, too busy n=2)           | Sample, page 8<br>Results, page 10                                      |
|    | Setting                      |                                                                                           |                                                                                                                         |                                                                         |
| 14 | Setting of data collection   | Where was the data collected? <i>e.g. home, clinic, workplace</i>                         | Leisure centre where ERS was attended                                                                                   | Data collection and analysis, page 9                                    |
| 15 | Presence of non-participants | Was anyone else present besides the participants and researchers?                         | No, interviews were conducted in private                                                                                | Data collection and analysis, page 9                                    |
| 16 | Description of sample        | What are the important characteristics of the sample? <i>e.g. demographic data, date</i>  | Gender, age group, medical reason for referral, employment status and previous PA<br>Date range for interviews reported | Results, Table 1<br><br>Data collection and analysis, page 9            |
|    | Data collection              |                                                                                           |                                                                                                                         |                                                                         |
| 17 | Interview guide              | Were questions, prompts, guides provided by the authors? Was it pilot tested?             | Semi-structured interview guide used. Pilot tested. Guides provided as supplementary files                              | Data collection and analysis, page 9<br><br>Supplementary files 1 and 2 |
| 18 | Repeat interviews            | Were repeat interviews carried out? If yes, how many?                                     | Yes, one further interview after 12-20 weeks                                                                            | Data collection and analysis, page 9                                    |
| 19 | Audio/visual recording       | Did the research use audio or visual recording to collect the data?                       | Yes, the interviews were audio recorded                                                                                 | Data collection and analysis, page 9                                    |
| 20 | Field notes                  | Were field notes made during and/or after the interview or focus group?                   | Yes detailed field notes were made directly after interviews                                                            | Data collection and analysis, page 9                                    |
| 21 | Duration                     | What was the duration of the interviews or focus groups?                                  | Range and median length reported: 22-62 minutes (median 48 minutes)                                                     | Data collection and analysis, page 9                                    |
| 22 | Data saturation              | Was data saturation                                                                       | Recruitment stopped                                                                                                     | Sample, page 8                                                          |

|                                        |                                |                                                                                                                                   |                                                                                                                                                                                                                                                                                      |                                         |
|----------------------------------------|--------------------------------|-----------------------------------------------------------------------------------------------------------------------------------|--------------------------------------------------------------------------------------------------------------------------------------------------------------------------------------------------------------------------------------------------------------------------------------|-----------------------------------------|
|                                        |                                | discussed?                                                                                                                        | when no new themes overarching were emerging                                                                                                                                                                                                                                         |                                         |
| 23                                     | Transcripts returned           | Were transcripts returned to participants for comment and/or correction?                                                          | Transcripts were checked by participants.                                                                                                                                                                                                                                            | Data collection and analysis, page 9    |
| <b>Domain 3: analysis and findings</b> |                                |                                                                                                                                   |                                                                                                                                                                                                                                                                                      |                                         |
| Data analysis                          |                                |                                                                                                                                   |                                                                                                                                                                                                                                                                                      |                                         |
| 24                                     | Number of data coders          | How many data coders coded the data?                                                                                              | N=2 (CLH and LJA) independently<br>N=4 in total at data workshops                                                                                                                                                                                                                    | Data collection and analysis, page 9    |
| 25                                     | Description of the coding tree | Did authors provide a description of the coding tree?                                                                             | Yes figure 2 visually describes the coding tree                                                                                                                                                                                                                                      | Figure 2                                |
| 26                                     | Derivation of themes           | Were themes identified in advance or derived from the data?                                                                       | Identified from data                                                                                                                                                                                                                                                                 | Data collection and analysis, page 9-10 |
| 27                                     | Software                       | What software, if applicable, was used to manage the data?                                                                        | No software used, data analysed manually using an excel spreadsheet                                                                                                                                                                                                                  | Data collection and analysis, page 9    |
| 28                                     | Participant checking           | Did participants provide feedback on the findings?                                                                                | No, but themes were checked with ERS staff at a workshop.                                                                                                                                                                                                                            | Data collection and analysis, page 10   |
| Reporting                              |                                |                                                                                                                                   |                                                                                                                                                                                                                                                                                      |                                         |
| 29                                     | Quotations presented           | Were participant quotations presented to illustrate the themes / findings? Was each quotation identified? e.g. participant number | Yes, participants identified using a pseudonym                                                                                                                                                                                                                                       | Results, page 10-17                     |
| 30                                     | Data and findings consistent   | Was there consistency between the data presented and the findings?                                                                | Themes were illustrated by participant quotations                                                                                                                                                                                                                                    | Results, page 10-17                     |
| 31                                     | Clarity of major themes        | Were major themes clearly presented in the findings?                                                                              | Three major experience themes were identified: success, struggle and defeat                                                                                                                                                                                                          | Results, page 10-17                     |
| 32                                     | Clarity of minor themes        | Is there a description of diverse cases or discussion of minor themes?                                                            | Minor themes identified within each major theme:<br>For success: improved health, increased PA, enjoyment and support<br>For struggle: scheme dependency, multiple barriers and cyclical needs<br>For defeat: inappropriate referral, poor participation experience, social anxiety. | Results, page 10-17                     |

1  
2  
3  
4  
5  
6  
7  
8  
9  
10  
11  
12  
13  
14  
15  
16  
17  
18  
19  
20  
21  
22  
23  
24  
25  
26  
27  
28  
29  
30  
31  
32  
33  
34  
35  
36  
37  
38  
39  
40  
41  
42  
43  
44  
45  
46  
47  
48  
49  
50  
51  
52  
53  
54  
55  
56  
57  
58  
59  
60

|  |  |  |                                       |  |
|--|--|--|---------------------------------------|--|
|  |  |  | Diverse cases discussed within themes |  |
|--|--|--|---------------------------------------|--|

For peer review only
