# Supplementary material for: How do participant experiences and characteristics influence engagement in exercise referral? A qualitative longitudinal study of a scheme in Northumberland, UK
Source: PubMed Central journal article supplement — BMJ Open. 2019 Feb 20;9(2):e024370. doi: 10.1136/bmjopen-2018-024370 (PMC6398729; doi:10.1136/bmjopen-2018-024370), 2019-02-20
Supplement: bmjopen-2018-024370supp001.pdf [file bmjopen-2018-024370supp001.pdf]

**Expectations of participants in the Northumberland exercise on referral scheme.**

**Preface:** Set the interviewee at rest; explain the purpose of the interview (to understand their expectations of the exercise on referral scheme) explain that the expected outcomes (that the study will give a better understanding of why the scheme works for some people, but not others); rules of confidentiality etc.

Record demographic / personal info to start:

- Gender
- Age
- Employment status

| Question                                                                                                                          | Prompts                                                                                                                                                                                                                                                                                                                                                                                                                                                                                                                                                                           |
|-----------------------------------------------------------------------------------------------------------------------------------|-----------------------------------------------------------------------------------------------------------------------------------------------------------------------------------------------------------------------------------------------------------------------------------------------------------------------------------------------------------------------------------------------------------------------------------------------------------------------------------------------------------------------------------------------------------------------------------|
| <p><b>1. Tell me a bit about what sort of physical activity you have taken part in in the past.</b></p>                           | <ul style="list-style-type: none"> <li>• <i>What were your experiences of sport /physical activity at school / as a child</i></li> <li>• <i>What influence have others had on the type of physical activity you have taken part in?</i></li> <li>• <i>Do you have any particular likes / dislikes of sport / physical activity?</i></li> <li>• <i>Tell me about any times in past where there has been a big change in your physical activity patterns</i></li> <li>• <i>Has there been anything else that has influenced your participation in physical activity?</i></li> </ul> |
| <p><b>2. How do you feel about taking part in physical activity now?</b></p>                                                      | <ul style="list-style-type: none"> <li>• <i>What type of physical activity (if any) do they take part in at the moment?</i></li> <li>• <i>What type of physical activity would they like to take part in?</i></li> <li>• <i>What do they think the important reasons for taking part in physical activity are?</i></li> <li>• <i>Is there anything that particularly worries them about taking part in physical activity?</i></li> </ul>                                                                                                                                          |
| <p><b>3. So thinking about the exercise on referral scheme that you have been referred to, how did you find out about it?</b></p> | <ul style="list-style-type: none"> <li>• <i>Who/ what has motivated you to attend?</i></li> <li>• <i>What made you decide that this is the right time to take part in the scheme?</i></li> </ul>                                                                                                                                                                                                                                                                                                                                                                                  |
| <p><b>4. Why were you referred to the scheme?</b></p>                                                                             | <ul style="list-style-type: none"> <li>• <i>What did the referrer explain to you about the scheme?</i></li> <li>• <i>What do you expect (if anything) when you start attending the scheme?</i></li> </ul>                                                                                                                                                                                                                                                                                                                                                                         |

|                                                                                                                           |                                                                                                                                                                                                                                                                                                                  |
|---------------------------------------------------------------------------------------------------------------------------|------------------------------------------------------------------------------------------------------------------------------------------------------------------------------------------------------------------------------------------------------------------------------------------------------------------|
|                                                                                                                           | <ul style="list-style-type: none"> <li>• <i>What type of health professional referred you?</i></li> </ul>                                                                                                                                                                                                        |
| <b>5. What do you hope to achieve by taking part in the scheme?</b>                                                       | <ul style="list-style-type: none"> <li>• <i>What are the changes to your health that you expect will happen as a result of participation?</i></li> <li>• <i>How quickly do you expect to see these changes?</i></li> <li>• <i>How have you decided that these changes are realistic?</i></li> </ul>              |
| <b>6. How do you feel about being referred?</b>                                                                           | <ul style="list-style-type: none"> <li>• <i>How confident do you feel about taking part in the scheme?</i></li> <li>• <i>What are you particularly looking forward to?</i></li> <li>• <i>What are you worried about?</i></li> </ul>                                                                              |
| <b>7. What happened after you were referred?</b>                                                                          | <ul style="list-style-type: none"> <li>• <i>How long after referral did it take to be contacted by the scheme?</i></li> <li>• <i>What information has been given to you prior to the initial consultation?</i></li> <li>• <i>How comfortable do you feel coming to first consultation?</i></li> </ul>            |
| <b>8. What are the things do you think will most influence you to attend sessions?</b>                                    | <ul style="list-style-type: none"> <li>• <i>How important do you think attendance in a group will be?</i></li> <li>• <i>What do you expect from the staff on the scheme?</i></li> <li>• <i>How important are changes in health?</i></li> <li>• <i>Why were the influences raised important?</i></li> </ul>       |
| <b>9. What things do you think are most likely to prevent you from attending sessions?</b>                                | <ul style="list-style-type: none"> <li>• <i>Tell me about any worries you might have about health issues</i></li> <li>• <i>Tell me about any other things such as other commitments that might stop you from attending</i></li> <li>• <i>What ways might you overcome these issues if they arise?</i></li> </ul> |
| <b>10. Is there anything else that you would like to tell me about your expectations for participation in the scheme?</b> |                                                                                                                                                                                                                                                                                                                  |
